1 Genome-scale functional profiling of cell cycle controls in African trypanosomes

2  
3  
4  
5 Catarina A. Marques<sup>1,3,§</sup>, Michele Tinti<sup>1,§</sup>, Andrew Cassidy<sup>2</sup> and David Horn<sup>1,\*</sup>

6  
7  
8  
9  
10 <sup>1</sup> Wellcome Trust Centre for Anti-Infectives Research, School of Life Sciences, University of  
11 Dundee, United Kingdom

12  
13 <sup>2</sup> Tayside Centre for Genomic Analysis, Ninewells Hospital and School of Medicine,  
14 University of Dundee, United Kingdom

15  
16 <sup>3</sup> Current address: Wellcome Trust Centre for Integrative Parasitology, University of  
17 Glasgow, United Kingdom

18  
19  
20  
21 § joint first authors

22  
23  
24  
25 \* Correspondence: [d.horn@dundee.ac.uk](mailto:d.horn@dundee.ac.uk)

26  
27  
28  
29 Keywords: checkpoint, kinetoplastid, RIT-seq, sleeping sickness, *Leishmania*, *Trypanosoma*  
30 *brucei*, *Trypanosoma cruzi*.

31

32 **Abstract**

33 Trypanosomatids, which include major pathogens of humans and livestock, are divergent  
34 eukaryotes for which cell cycle controls and the underlying mechanisms are not completely  
35 understood. Here, we describe a genome-wide RNA-interference library screen for cell cycle  
36 regulators in bloodstream form *Trypanosoma brucei*. We induced massive parallel  
37 knockdown and sorted the perturbed population into cell cycle stages using flow cytometry.  
38 RNAi-targets were deep-sequenced from each stage and cell cycle profiles were digitally  
39 reconstructed at a genomic scale. We identify hundreds of proteins that impact cell cycle  
40 progression; glycolytic enzymes required for G<sub>1</sub>S progression, DNA replication factors,  
41 mitosis regulators, proteasome and kinetochore complex components required for G<sub>2</sub>M  
42 progression, flagellar and cytoskeletal components required for cytokinesis, mRNA-binding  
43 factors, protein kinases and many previously uncharacterised proteins. The outputs facilitate  
44 functional annotation and drug-target prioritisation and provide comprehensive functional  
45 genomic evidence for the machineries, pathways and regulators that coordinate progression  
46 through the trypanosome cell cycle.

47

48

49 *The data can be searched and browsed using an interactive, open access, online data*  
50 *visualization tool (<https://tryp-cycle.onrender.com>).*

## 51 Introduction

52 The canonical eukaryotic cell cycle encompasses discrete phases: G<sub>1</sub> (gap 1), when  
53 the cell prepares for DNA replication; S (synthesis) phase, when nuclear DNA replication  
54 takes place; G<sub>2</sub> (gap 2), when the cell prepares for mitosis; and M (mitosis) when the  
55 replicated DNA is segregated and the nucleus divides (1). Mitosis is immediately followed by  
56 cytokinesis (cell division), generating two daughter cells (2). Anomalies occurring during cell  
57 cycle progression can result in cell cycle arrest, to allow the cell to resolve the anomaly; in  
58 cell death, if the anomaly cannot be resolved or, among other outcomes, carcinogenesis.  
59 Therefore, progression through the cell cycle is typically under strict checkpoint control; the  
60 G<sub>1</sub>-S, intra S phase, G<sub>2</sub>-M and spindle checkpoints control the onset of S phase, S phase  
61 progression, the onset of M phase and M phase progression, respectively (3). These  
62 processes have been extensively studied, particularly because cell cycle defects are  
63 common triggers for carcinogenesis (4). However, our understanding of the evolution and  
64 mechanisms of eukaryotic cell cycle progression control derives primarily from studies on the  
65 opisthokonts (including animals and fungi), with relatively fewer studies on more divergent  
66 eukaryotes, such as the trypanosomatids (1).

67 The trypanosomatids are flagellated protozoa and include parasites that cause a  
68 range of neglected tropical diseases that have major impacts on human and animal health.  
69 The African trypanosome, *Trypanosoma brucei*, is transmitted by tsetse flies and causes  
70 both human and animal diseases, sleeping sickness and nagana, respectively, across sub-  
71 Saharan Africa (5). *T. brucei* has emerged as a highly tractable experimental system, both  
72 as a parasite and as a model organism (6). For example, the *T. brucei* flagellum (7) serves  
73 as a model for studies on human ciliopathies (8-11). Divergent features, shared with other  
74 pathogenic trypanosomatids, such as *Trypanosoma cruzi* and *Leishmania*, include glycolysis  
75 compartmentalised within glycosomes (12), a single mitochondrion with a complex  
76 mitochondrial DNA structure known as the kinetoplast (13) and polycistronic transcription of  
77 almost every gene (14). Widespread, and constitutive, polycistronic transcription in  
78 trypanosomatids places major emphasis on post-transcriptional controls by mRNA binding  
79 proteins (RBPs) and post-translational controls, involving protein phosphorylation in  
80 particular.

81 Studies that focus on cell cycle controls in *T. brucei* have revealed features that are  
82 conserved with other well-studied eukaryotes, but also features that are divergent (13,15).  
83 Most notably, the available evidence suggest that certain cell cycle checkpoints are absent.  
84 For example, cytokinesis is not dependent upon either mitosis or nuclear DNA synthesis in  
85 the insect stage of *T. brucei* (16). Moreover, functions previously thought to be fulfilled by  
86 highly conserved proteins employ lineage-specific or highly divergent proteins in  
87 trypanosomatids. The kinetochore complex, which directs chromosome segregation, is

88 trypanosomatid-specific, for example (17), while the origin recognition complex (ORC),  
89 involved in DNA replication initiation, is highly divergent (18). In terms of high-throughput  
90 studies, transcriptome (19) and proteome (20) monitoring during the *T. brucei* cell cycle  
91 revealed hundreds of regulated mRNAs and proteins, while phosphoproteomic analysis  
92 revealed dynamic phosphorylation of several RBPs (21). Nevertheless, divergence presents  
93 a substantial challenge, many *T. brucei* genes have not yet been assigned a specific  
94 function, and many cell cycle regulators likely remain to be identified.

95 High-throughput functional genetic screens can be used to simultaneously assess  
96 every gene in a genome for a role in a particular process. We developed RNA interference  
97 Target Sequencing (RIT-seq) for *T. brucei* (22) and previously generated genome-scale  
98 fitness profiles, facilitating essentiality predictions and the prioritisation of potential drug  
99 targets (23). Here we describe a genome-scale RIT-seq screen to identify cell cycle controls  
100 and regulators in bloodstream form African trypanosomes. Following induction of  
101 knockdown, the cells were sorted according to their DNA content using fluorescence-  
102 activated cell sorting (FACS). The sorted populations were the G<sub>1</sub>, S and G<sub>2</sub>M cell cycle  
103 stages as well as perturbed cell populations with either less DNA than typically found in G<sub>1</sub>  
104 or more DNA than typically found in G<sub>2</sub>M. RIT-seq analysis was then carried out for each  
105 sorted population and cell cycle profiles were digitally reconstructed for each gene using  
106 sequencing read-counts. This genome-wide screen reveals the protein complexes, pathways  
107 and signalling factors that coordinate progressive steps through the trypanosome cell cycle,  
108 both improving our understanding of trypanosome cell biology and also further facilitating the  
109 prioritisation of new potential drug targets.

## 110 **Results**

### 111 **A genome-wide conditional knockdown screen for cell cycle progression defects**

112 Bloodstream form *T. brucei* are readily grown in cell culture, with exponential  
113 proliferation and a doubling time of approximately 6.5 h. The *T. brucei* genome is diploid  
114 such that G<sub>1</sub> cells have a 2C genome content; C represents the haploid DNA content. Cells  
115 progressing through nuclear S phase, and replicating their DNA, have a genome content  
116 between 2C and 4C, while cells that have completed DNA replication (G<sub>2</sub>M) have a 4C DNA  
117 content (**Figure 1A**). Cytokinesis then produces two daughter cells with a 2C DNA content.  
118 Some perturbations can yield defects which become apparent when cytokinesis produces  
119 sub-2C cells or over-replicated, polyploid (>4C) cells (**Figure 1A**). These polyploid cells arise  
120 due to endoreduplication, additional rounds of DNA replication without cytokinesis, either  
121 with (24) or without (25,26) mitosis, yielding cells with multiple diploid nuclei or cells with  
122 polyploid nuclei, respectively.

123 We devised a high-throughput RNA interference (RNAi) Target sequencing (RIT-seq)  
124 screen to identify cell cycle controls and regulators at a genomic scale. Key features of RIT-  
125 seq screening include: first, use of a high-complexity *T. brucei* RNAi library comprising, in  
126 this case, approximately one million clones; second, massive parallel tetracycline-inducible  
127 expression of cognate dsRNA; and third, deep sequencing, mapping and counting of  
128 mapped reads derived from RNAi target fragments (22). Each clone in the library has one of  
129 approximately 100,000 different RNAi target fragments (250-1500 bp) between head-to-head  
130 inducible T7-phage promoters, with each cassette inserted at a chromosomal locus that  
131 supports robust expression. Inducibly expressed long dsRNA is then processed to siRNA by  
132 the native RNAi machinery (27). Complexity and depth of genome coverage in the library are  
133 critical, in that similar phenotypes produced by multiple RNAi target fragments against a  
134 single gene provide cross-validation. Improvements in reference genome annotation (28),  
135 next generation sequencing technology and sequence data analysis tools (see Materials and  
136 Methods) have also greatly facilitated quantitative phenotypic analysis using short-read  
137 sequence data.

138 Briefly, we induced massive parallel knockdown in an asynchronous *T. brucei*  
139 bloodstream form RNAi library for 24 h, fixed the cells, stained their DNA with propidium  
140 iodide (PI) and then used high-speed fluorescence-activated cell sorting (FACS) to divide the  
141 perturbed cell population into; sub-diploid (<2C), G<sub>1</sub> (2C), S (between 2C and 4C), G<sub>2</sub>M (4C)  
142 and over-replicated (>4C) pools (**Figure 1—figure supplement 1**). Fixation and staining  
143 with the fluorescent DNA intercalating dye were pre-optimised for high-speed sorting (see  
144 Materials and Methods). Approximately 10 million cells were collected for each of the G<sub>1</sub>, S  
145 and G<sub>2</sub>M pools and samples from these pools were checked post-sorting to assess their  
146 purity (**Figure 1B, Figure 1—figure supplement 1**). For the perturbed and less abundant

Figure 1

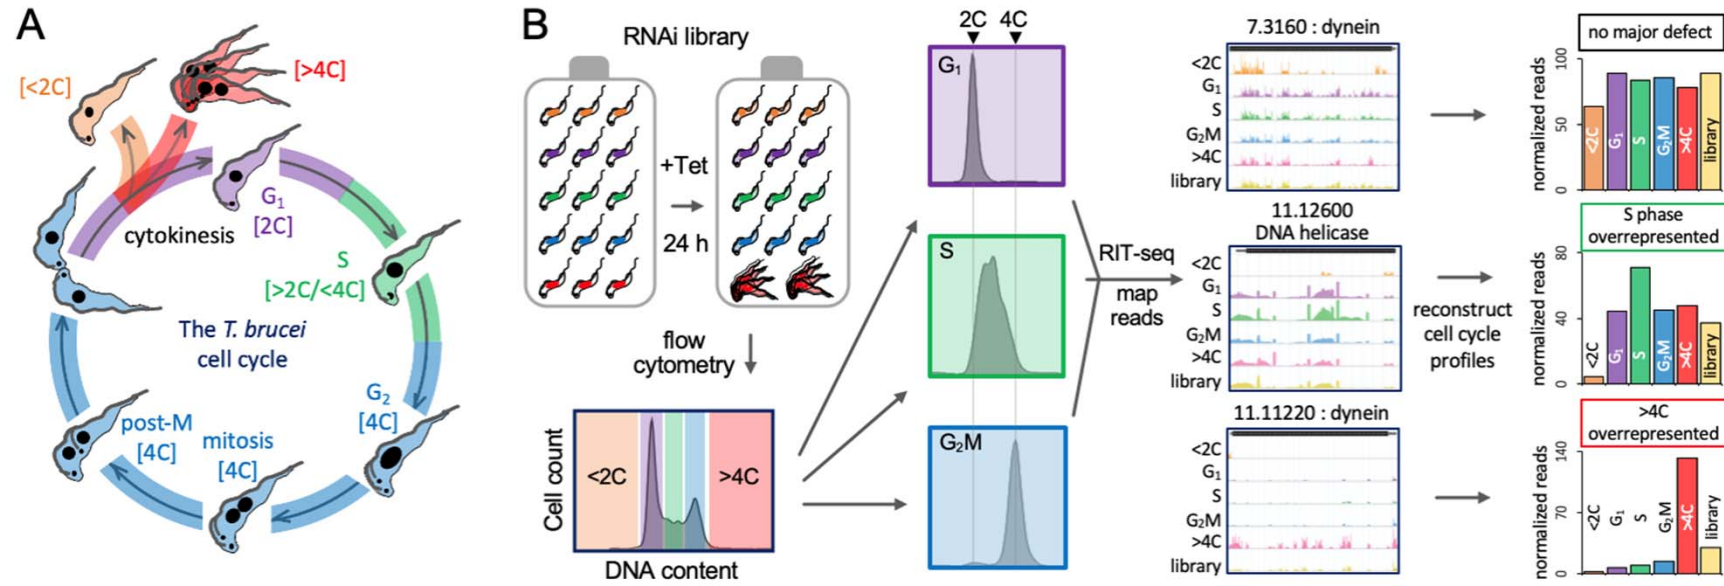

**Figure 1.** A genome-wide conditional knockdown screen for cell cycle progression defects. **(A)** Schematic representation of the bloodstream form *T. brucei* cell cycle, also showing aberrant sub-2C and >4C phenotypes. **(B)** The schematic illustrates the RIT-seq screen; massive parallel induction of RNAi followed by flow cytometry and RIT-seq, allowing for reconstruction of cell cycle profiles, using mapped reads from each knockdown. Each read-mapping profile encompasses the gene of interest and associated untranslated regions present in the cognate mRNA. The library data represents the uninduced and unsorted population. GeneIDs, Tb927.7.3160 for example, are shown without the common ‘Tb927.’ component.

147 <2C and >4C pools, less than one million cells were collected; these pools were retained in  
148 their entirety for RIT-seq analysis.

149 RIT-seq was carried out for both the uninduced and induced, unsorted library  
150 controls, and for each of the five induced and sorted pools of cells as described in the  
151 Materials and Methods section. Briefly, we extracted genomic DNA from each sample,  
152 amplified DNA fragments containing each RNAi target fragment in PCR reactions (*Figure*  
153 *1—figure supplement 1*) and used the amplified products to generate Illumina sequencing  
154 libraries. Analysis of sequencing reads mapped to the reference genome yielded counts for  
155 both total reads as well as reads containing the barcode (GTGAGGCCTCGCGA) that flanks  
156 each RNAi target fragment; the presence of the barcode confirmed that reads were derived  
157 from a specific RNAi target fragment and not from elsewhere in the genome. We derived  
158 counts of reads mapped to each of >7,200 non-redundant gene sequences in the uninduced  
159 and induced, unsorted library controls and in each of the five sorted samples. We selected  
160 the 24 h timepoint, equivalent to approximately 3.5 population doubling times, to allow  
161 sufficient time for the development of robust inducible phenotypes, but also to capture  
162 perturbed populations before they were critically diminished. Indeed, reads for 23.4% of  
163 genes dropped by >3-fold following 72 h of knockdown in a prior RIT-seq study (23), while a  
164 comparison of the unsorted control samples indicated that reads for only 0.6% of genes  
165 dropped by >3-fold following 24 h of knockdown here (see *Figure 1—figure supplement 2*).  
166 Each sorted-sample library yielded between 22.6 and 37 million mapped read-pairs; <2C =  
167 37 M, G<sub>1</sub> = 35.1 M, S = 30.3 M, G<sub>2</sub>M = 22.6 M, >4C = 24.9 M; yielding >35,000 RNAi data-  
168 points (*Supplementary File 1*).

169 The RIT-seq digital data for individual genes following knockdown provided a  
170 measure of abundance in each pool and were, therefore, used to digitally reconstruct cell  
171 cycle profiles for individual gene knockdowns (*Figure 1B*). We expected to observe  
172 accumulation of particular knockdowns in specific cell cycle phase pools, thereby reflecting  
173 specific defects. This was indeed the case, and some examples are shown to illustrate; no  
174 major defect, S phase overrepresented or >4C overrepresented, following knockdown  
175 (*Figure 1B*). These outputs suggest that loss of the cytoplasmic dynein heavy chain  
176 (Tb927.7.3160) does not perturb cell cycle distribution; that a putative DNA helicase  
177 (Tb927.11.12600) is required for the completion of S phase; and that knockdown of the  
178 axonemal dynein heavy chain (Tb927.11.11220) results in endoreduplication in the absence  
179 of cytokinesis. Dyneins are cytoskeletal motor proteins that move along microtubules, to  
180 produce a flagellar beat, for example (29).

181

182 **Validation and identification of >1,000 candidates linked to cell cycle defects**

183 The *T. brucei* core genome comprises a non-redundant set of over 7,200 protein-  
184 coding sequences, for which we were now able to digitally reconstruct cell cycle profiles  
185 following knockdown; the full dataset is shown mapped to the eleven megabase  
186 chromosomes in **Figure 2—figure supplement 1**. The data can also be searched and  
187 browsed using an interactive, open access, online data visualization tool (see **Figure 2—**  
188 **figure supplement 2**; <https://tryp-cycle.onrender.com>). First, we examined knockdowns  
189 reporting an overrepresentation of >4C cells, indicating endoreduplication, and this yielded  
190 201 genes for which reads in the >4C pool exceeded 1.5-fold the sum of reads in the G<sub>1</sub>, S  
191 phase and G<sub>2</sub>M pools (**Figure 2A**, left-hand panel; **Supplementary File 1**). The >4C  
192 phenotype was previously observed following  $\alpha$ -tubulin knockdown in a landmark study that  
193 first described RNAi in *T. brucei* (24) and, indeed, we observed pronounced  
194 overrepresentation of >4C cells for both adjacent  $\alpha$ -tubulin (Tb927.1.2340) and  $\beta$ -tubulin  
195 (Tb927.1.2350) gene knockdowns (**Figure 2A**, middle and right-hand panel). We then  
196 examined knockdowns reporting an overrepresentation of <2C cells, indicating a reduced  
197 DNA content. This yielded 119 genes for which reads in the <2C pool exceeded 1.5-fold the  
198 sum of reads in the G<sub>1</sub>, S phase and G<sub>2</sub>M pools (**Figure 2B**, left-hand panel;  
199 **Supplementary File 1**). Haploid cells were previously observed following DOT1A  
200 knockdown (30) and, consistent with the previous report, we observed pronounced  
201 overrepresentation of <2C cells for the DOT1A (Tb927.8.1920) gene knockdown (**Figure 2A**,  
202 middle and right-hand panel); we are not aware of other knockdowns reported to yield a  
203 similar phenotype. Together, these results provide initial validation for the >4C and <2C  
204 components of the screen.

205 Next, we turned our attention to knockdowns reporting an overrepresentation of G<sub>1</sub>, S  
206 phase or G<sub>2</sub>M cells. The pools of knockdowns that registered >25% overrepresented read  
207 counts in each of these categories are highlighted in **Figure 2C** (left-hand panels and  
208 **Supplementary File 1**) and data for an example from each category are shown (**Figure 2C**,  
209 right-hand panels); the glycolytic enzyme, aldolase (Tb927.10.5620), reported 104%  
210 increase in G<sub>1</sub> cells (further details below); the proliferating cell nuclear antigen (PCNA;  
211 Tb927.9.5190), a DNA sliding clamp that is a central component of the replication machinery  
212 (31), reported 25% increase in S phase cells, consistent with prior analysis (32); and  
213 PrimPol-like 2 (PPL2; Tb927.10.2520), a post-replication translesion polymerase, reported  
214 65% increase in G<sub>2</sub>M cells, also consistent with prior analysis (33). These results provided  
215 initial validation for the G<sub>1</sub>, S phase and G<sub>2</sub>M components of the screen.

216 Overall, the five components of the screen yielded 1,158 genes that registered a cell  
217 cycle defect, based on the thresholds applied above. This is 16.1% of the 7,204 genes  
218 analysed, and the distribution of these genes among the five arms of the screen are shown



Figure 2

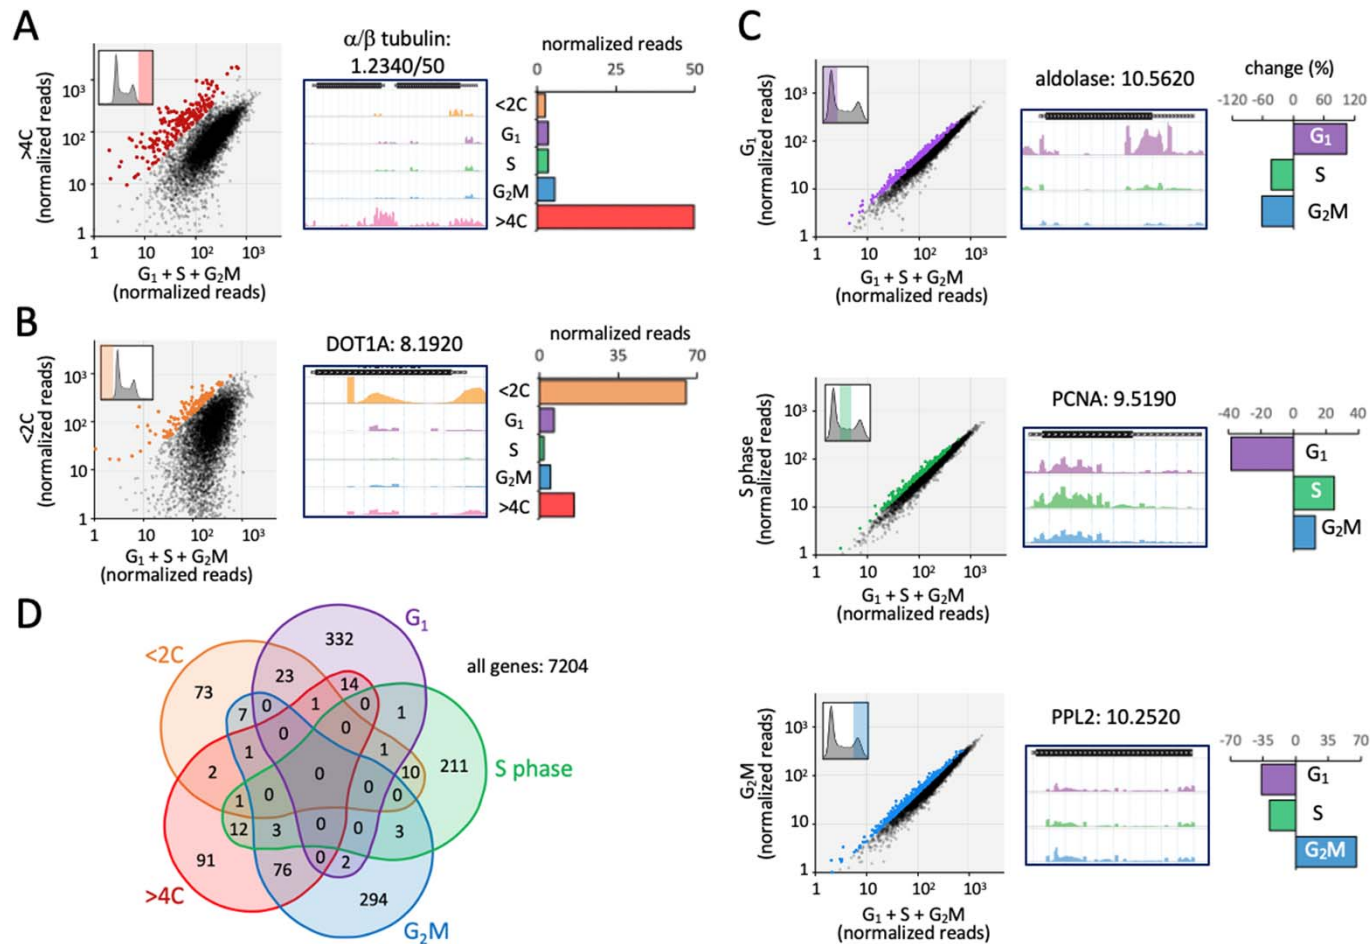

**Figure 2.** Validation and identification of >1000 candidates linked to cell cycle defects. **(A)** The plot on the left shows knockdowns overrepresented in the >4C experiment in red; those with >1.5-fold the sum of reads in the G<sub>1</sub>, S phase and G<sub>2</sub>M samples combined. The read-mapping profile and read-counts for  $\alpha/\beta$ -tubulin are shown to the right. **(B)** The plot on the left shows knockdowns overrepresented in the sub-2C experiment in orange; those with >1.5-fold the sum of reads in the G<sub>1</sub>, S phase and G<sub>2</sub>M samples combined. The read-mapping profile and read-counts for DOT1A are shown to the right. **(C)** The plots on the left shows knockdowns overrepresented in the G<sub>1</sub>, S phase and G<sub>2</sub>M experiments in purple, green and blue, respectively; those that were >25% overrepresented in each category. Read-mapping profiles and relative read-counts for example hits are shown to the right. PCNA, proliferating cell nuclear antigen; PPL2, PrimPol-like 2. **(D)** The Venn diagram shows the distribution of knockdowns overrepresented in each arm of the screen.

219 in the Venn diagram in **Figure 2D**. Since we predicted that knockdowns associated with a  
220 cell cycle defect were more likely to also register a growth defect, we compared these  
221 datasets to prior RIT-seq fitness profiling data (23). All groups of genes that registered cell  
222 cycle defects, except for the <2C set, were significantly enriched for genes that previously  
223 registered a loss-of-fitness phenotype following knockdown in bloodstream form cells ( $\chi^2$   
224 test; <2C,  $p = 0.15$ ; G<sub>1</sub>,  $p = 0.015$ ; S,  $p = 4.7^{-4}$ ; G<sub>2</sub>M,  $p = 3.5^{-24}$ ; >4C,  $p = 4.4^{-199}$ ). This is  
225 consistent with loss-of-fitness as a common outcome following a cell cycle progression  
226 defect. Taken together, the analyses above provided validation for the RIT-seq based cell  
227 cycle phenotyping approach and yielded >1,000 candidate genes that impact specific steps  
228 during *T. brucei* cell cycle progression.

229

### 230 **Cytokinesis defects associated with endoreduplication**

231 In bloodstream form *T. brucei*, defective >4C cells can arise due to endoreduplication  
232 without cytokinesis, either with (24) or without (25,26) mitosis. Cytokinesis-only defects were  
233 previously observed following knockdown of  $\alpha$ -tubulin (24) or flagellar proteins (7,34);  
234 flagellar beat is thought to be required for cytokinesis in bloodstream form *T. brucei*.  
235 Consistent with these observations,  $\alpha$ -tubulin (see **Figure 2A**) and axonemal dynein heavy  
236 chain (see **Figure 1B**) knockdowns were amongst 201 genes overrepresented in the >4C  
237 pool in our screen. Gene Ontology (GO) annotations provide structured descriptions of gene  
238 products in terms of functions, processes, and compartments. Analysis of overrepresented  
239 GO annotations within the >4C-enriched cohort revealed 'dynein', 'intraflagellar transport'  
240 (IFT), 'axoneme' and 'cytoskeleton' terms, and also 'chaperonin T-complex', 'cytokinesis'  
241 and multiple other 'cell cycle' terms (**Figure 3A**). The violin plot in **Figure 3B** shows specific  
242 enrichment of IFT and dynein knockdowns in the >4C pool, relative to other cohorts of  
243 knockdowns. Exocyst components, primarily involved in exocytosis (35), were included as a  
244 negative control cohort; indeed, none of the exocyst components register enrichment in the  
245 >4C pool, nor in any other pool (see below). Enrichment of individual chaperonin T-complex  
246 components, dyneins, and IFT factors in the >4C pool is illustrated in **Figure 3C**. The  
247 chaperonin T-complex is involved in tubulin and actin folding (36) and, notably, actin  
248 knockdown was also associated with >4C enrichment (**Figure 3—figure supplement 1**).

249 The heat-map in **Figure 3D** shows the data for all five sorted pools for the cohorts  
250 described above and for additional cohorts of knockdowns enriched in the >4C pool; these  
251 include radial spoke proteins, extra-axonemal paraflagellar rod (PFR) proteins, as well as  
252 nucleoporins. The gallery in **Figure 3E** shows examples of RIT-seq read-mapping profiles  
253 for twenty-four individual genes that register >4C enrichment following knockdown. In  
254 addition to the categories above, these include the inner arm dynein 5-1 (37), FAZ proteins

Figure 3

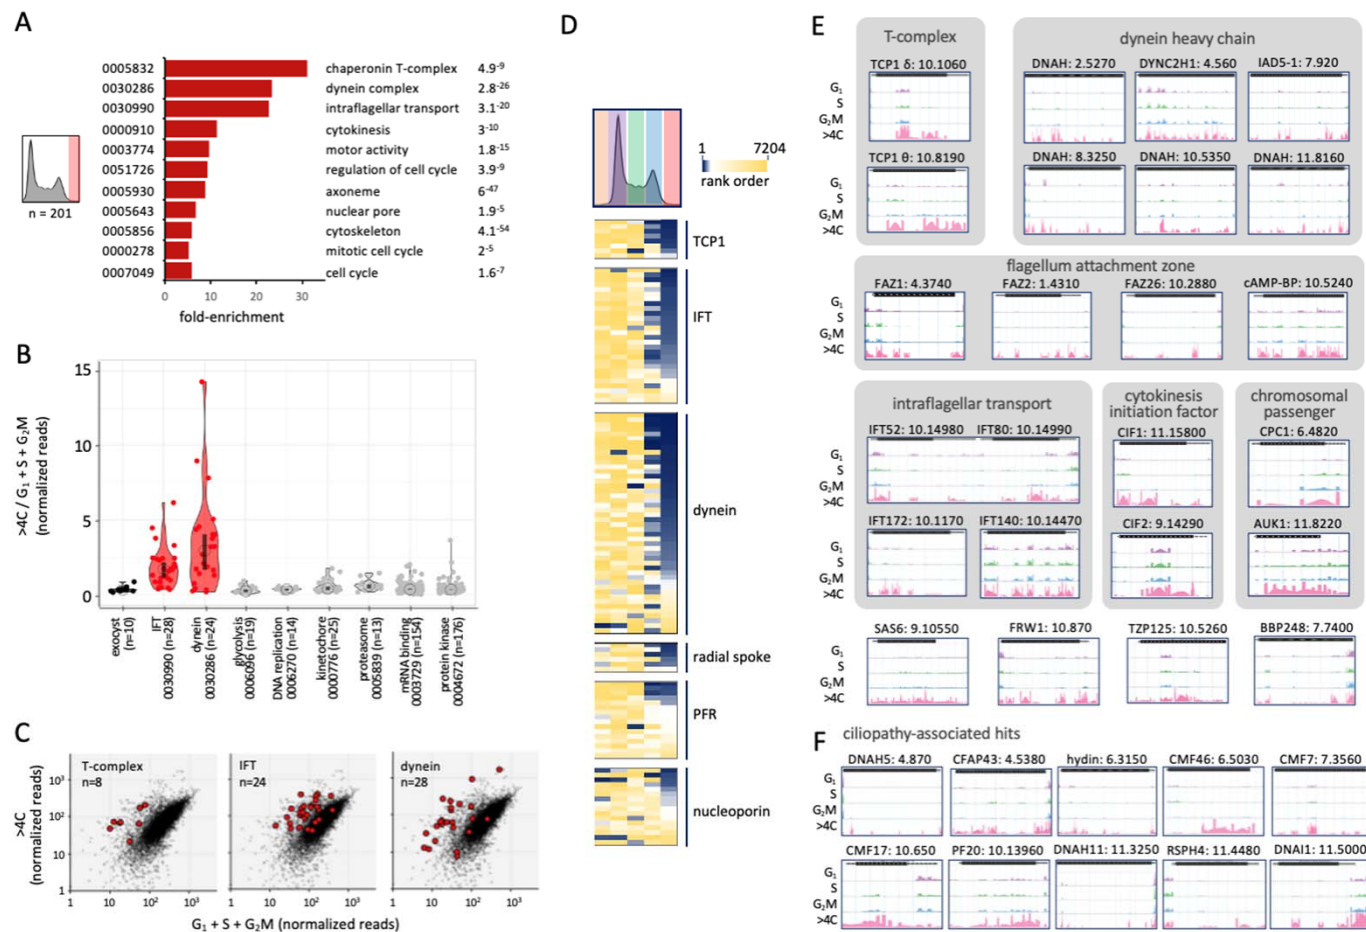

**Figure 3.** Cytokinesis defects associated with endoreduplication. **(A)** The bar-graph shows enriched Gene Ontology terms in the >4C overrepresented dataset. **(B)** The violin plot shows relative >4C read-counts for cohorts of genes and reflects data distribution. Open circles indicate median values and the vertical bars indicate 95% confidence intervals. Significantly overrepresented cohorts are indicated in red. **(C)** The plots show overrepresentation of T-complex, dynein and intraflagellar transport (IFT) factors in red in the >4C experiment. **(D)** The heatmaps show relative representation in all five sorted pools for the above and additional cohorts of knockdowns; blue, most overrepresented. **(E)** Example read-mapping profiles for hits overrepresented in the >4C pool. **(F)** Example read-mapping profiles for ciliopathy-associated hits overrepresented in the >4C pool. CMF, Component of Motile Flagella; CFAP, Cilia and Flagella Associated Protein.

255 which mediate attachment of the flagellum to the cell body (38); cytokinesis initiation factors  
256 CIF1/TOEFAZ1 (Tb927.11.15800) and CIF2 (Tb927.9.14290) (39) and chromosomal  
257 passenger complex components, including CPC1 (Tb927.6.4820) and the aurora B kinase,  
258 AUK1 (Tb927.11.8220). AUK1 and CPC1 are spindle-associated and regulate mitosis and  
259 cytokinesis (26,40). Notably, endoreduplication was reported previously following AUK1  
260 knockdown in bloodstream form *T. brucei* (41) and this is the kinase with the most  
261 pronounced overrepresentation in our >4C dataset. The next >4C overrepresented kinase is  
262 the CMGC/RCK (Tb927.3.690), knockdown of which previously yielded a dramatic  
263 cytokinesis defect (42).

264 Additional examples of genes registering >4C overrepresentation include the  
265 centriole cartwheel protein SAS6 (Tb927.9.10550) (43), the cleavage furrow-localizing  
266 protein FRW1 (Tb927.10.870) (44), the basal body – axoneme transition zone protein  
267 TZP125 (Tb927.10.5260) (45) and the basal body protein BBP248 (Tb927.7.7400) (46). One  
268 hundred additional examples are shown in [Figure 3—figure supplement 1](#), including  
269 intermediate and light chain dyneins; other flagellum-associated factors, radial spoke  
270 proteins, components of motile flagella, flagellum attachment and transition zone proteins,  
271 intraflagellar transport proteins, kinesins (47,48), nucleoporins (49), and many previously  
272 uncharacterised hypothetical proteins. Some other notable examples include the  
273 microtubule-severing katanin KAT80 (Tb927.9.9960) (50), the dynein regulatory factor  
274 trypanin (Tb927.10.6350) (51), the AIR9 microtubule associated protein (Tb927.11.17000)  
275 (52), CAP51V (Tb927.7.2650) (53) and importin, IMP1 (Tb927.9.13520) (54).

276 Orthologues of several *T. brucei* flagellar proteins have previously been linked to  
277 debilitating human ciliopathies, such that the trypanosome flagellum is used as a model for  
278 studies on these defects. Defects in intraflagellar dynein transport are associated with  
279 respiratory infections, for example (9). Some examples of ciliopathy-associated orthologues  
280 which register overrepresentation in the >4C pool are shown in [Figure 3F](#) and [Figure 3—](#)  
281 [figure supplement 1](#). These include proteins linked to primary ciliary dyskinesia (DNAI1,  
282 Tb927.11.5000; DNAH5, Tb927.4.870; DNAH11, Tb927.11.3250; RSPH4, Tb927.11.4480)  
283 (11); male infertility (CFAP43, Tb927.4.5380; CMF7/TbCFAP44, Tb927.7.3560) (10); and  
284 cone-rod dystrophies, as well as other ocular defects (CMF17, Tb927.10.650; CMF39,  
285 Tb927.4.5370; CMF46, Tb927.6.5030) (8).

286 From analysis of knockdowns overrepresented in the >4C pool, we conclude that  
287 RIT-seq screening provided comprehensive genome-scale identification of cytokinesis  
288 defects in bloodstream form *T. brucei*. Endoreduplication appears to be a common outcome  
289 following a cytokinesis defect. Amongst hundreds of genes required for progression through  
290 cytokinesis, flagellar proteins featured prominently, including the majority of dynein chains  
291 and intraflagellar transport factors. Many of these factors are essential for viability and

Figure 4

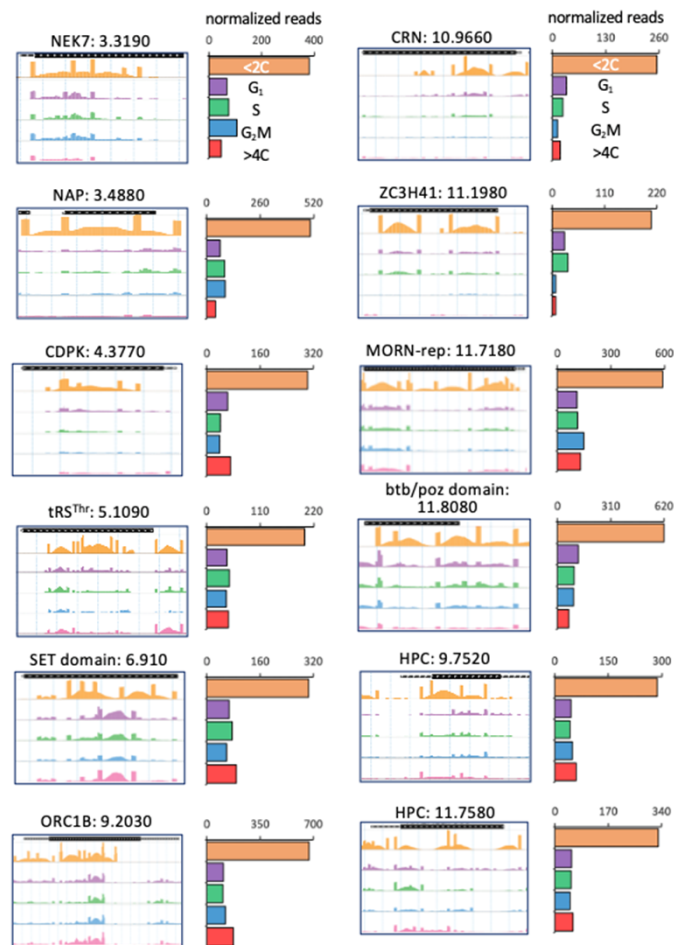

**Figure 4.** Defects producing sub-diploid cells. Read-mapping profiles and read-counts for example hits overrepresented in the <2C experiment. HPC, Hypothetical Protein, Conserved.

292 include potential druggable targets in trypanosomatids, as well as orthologues of proteins  
293 associated with ciliopathies.

294

### 295 **Defects producing sub-diploid cells**

296 A DNA replication or mitosis defect followed by cytokinesis may result in generation  
297 of cells that retain nuclear DNA with a sub-2C DNA content. We emphasise retention of  
298 nuclear DNA here because *T. brucei* cells lacking nuclear DNA, referred to as zoids, have  
299 been reported previously as a result of asymmetrical cell division. Zoids are typically  
300 observed when DNA replication or mitosis are perturbed in insect stage cells (16,25,55). The  
301 zoid phenotype is typically either absent or less abundant in the developmentally distinct  
302 bloodstream form cells (56) that we analysed here. Nevertheless, any zoids present in the  
303 <2C pool will not have been detected using RIT-seq, since detection relies upon the  
304 presence of a nuclear RNAi target fragment.

305 One hundred and nineteen knockdowns were overrepresented in the <2C RIT-seq  
306 screening dataset. A particularly prominent hit was the previously identified histone  
307 methyltransferase, DOT1A (see above). DOT1A is responsible for dimethylation of histone  
308 H3K76, and DOT1A knockdown results in premature mitosis without DNA replication,  
309 generating cells with a haploid DNA content (30). The gallery in [Figure 4](#) shows examples of  
310 RIT-seq read-mapping profiles for twelve additional genes that register <2C enrichment  
311 following knockdown. These include the DNA replication origin recognition complex-  
312 associated protein, ORC1B (Tb927.9.2030) (57), two putative protein kinases (NEK7,  
313 Tb927.3.3190; CDPK, Tb927.4.3770), a putative mRNA-binding helicase (ZC3H41,  
314 Tb927.11.1980), a nucleosome assembly protein (NAP, Tb927.3.4880) and threonyl-tRNA  
315 synthetase (Tb927.5.1090). Notably, threonine metabolism impacts histone methylation in  
316 mammalian cells (58), while a protein containing a putative methyllysine-binding SET  
317 domain (Tb927.6.910) also registers enrichment in the <2C pool. These hits present new  
318 candidate regulators of DNA replication, mitosis or meiosis (59), and further potential links to  
319 post-translational protein methylation as a key player in coordinating these processes.

320

### 321 **A profile of G<sub>1</sub>, S phase and G<sub>2</sub>M defects**

322 We next analysed knockdowns overrepresented in the G<sub>1</sub>, S phase or G<sub>2</sub>M pools.  
323 Several hundred knockdowns registered >25% overrepresented read counts in each of  
324 these categories, as shown in a RadViz plot ([Figure 5A](#)). GO annotations within each cohort  
325 revealed a number of enriched terms ([Figure 5B](#)). Overrepresented knockdowns were  
326 associated with glycolysis and mRNA binding in the G<sub>1</sub> pool, with DNA replication in the S  
327 phase pool and with a similar profile to that seen for the >4C set in the G<sub>2</sub>M pool.

Figure 5

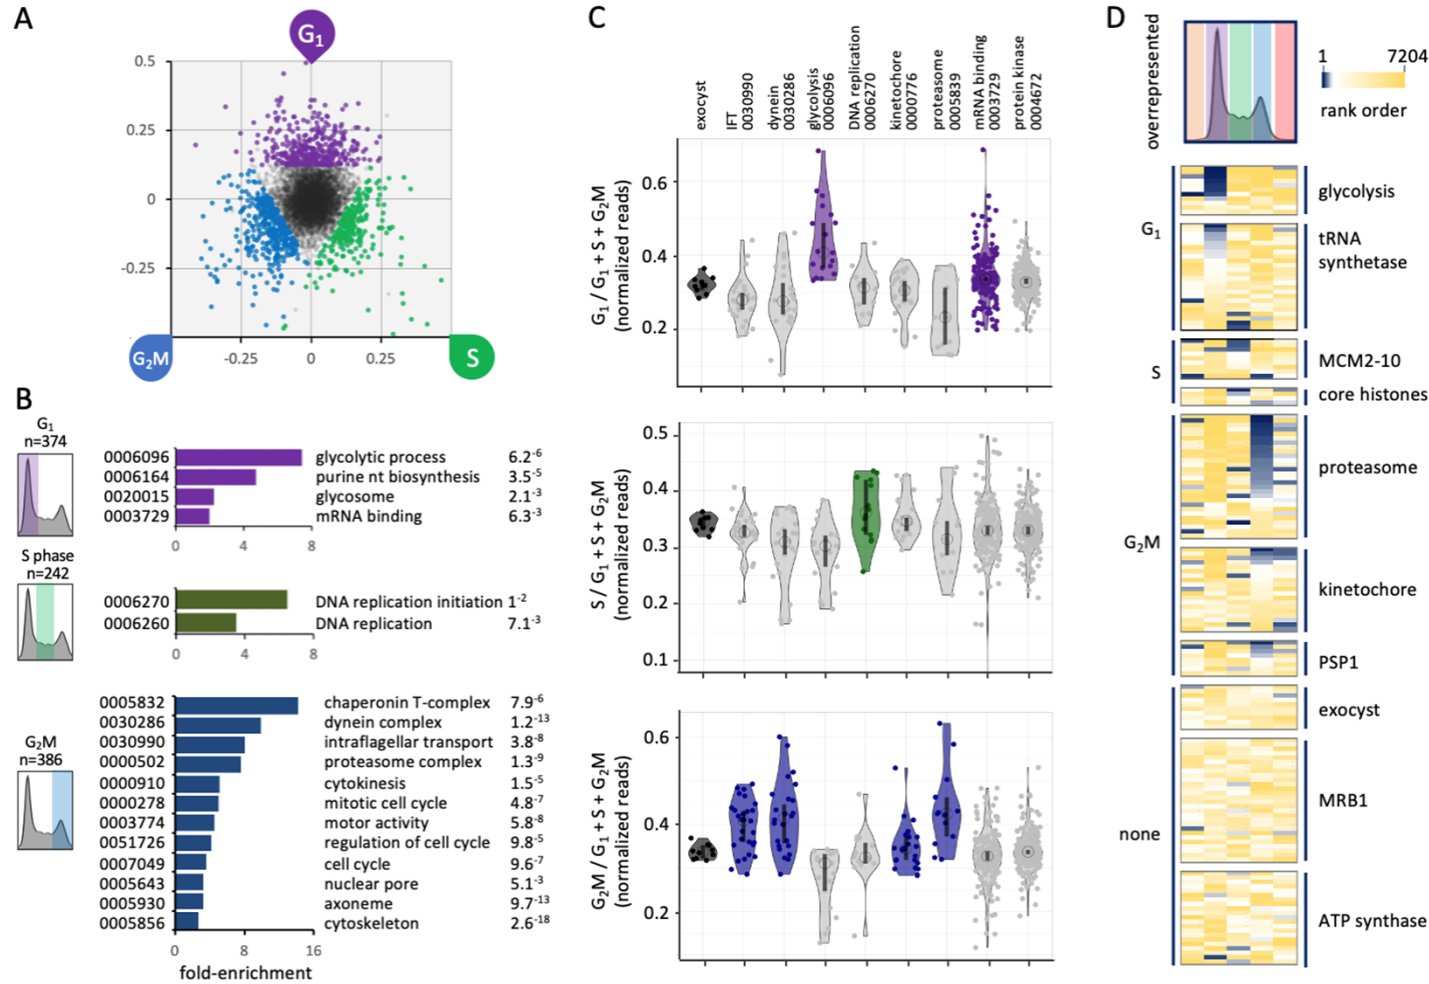

**Figure 5.** A profile of  $G_1$ , S phase and  $G_2$ /mitosis defects. **(A)** The RadViz plot shows knockdowns that registered >25% overrepresented read-counts in the  $G_1$ , S phase or  $G_2$ M categories. **(B)** The bar-graphs shows enriched Gene Ontology terms in the  $G_1$ , S phase or  $G_2$ M overrepresented datasets. **(C)** The violin plots show relative  $G_1$ , S phase or  $G_2$ M read-counts for cohorts of genes and reflects data distribution. Open circles indicate median values and the vertical bars indicate 95% confidence intervals. Overrepresented cohorts are indicated in purple, green and blue, respectively. **(D)** The heatmaps show relative representation in all five sorted pools for the above and additional cohorts of knockdowns; blue, most overrepresented.

328 The violin plot in **Figure 5C** shows specific enrichment of individual knockdowns for  
329 glycolytic enzymes and a subset of mRNA binding protein in the G<sub>1</sub> pool, for DNA replication  
330 factors in the S phase pool, and proteasome components and a subset of kinetochore  
331 component in the G<sub>2</sub>M pool (**Figure 5C**, lower panel). Overlap between knockdowns that  
332 accumulate in both the G<sub>2</sub>M and >4C pools likely reflects mitosis and cytokinesis defects  
333 both before and after endoreduplication; perhaps 24 h of knockdown is insufficient for  
334 endoreduplication in all perturbed cells or not all mitosis or cytokinesis-perturbed phenotypes  
335 result in endoreduplication; compare >4C and G<sub>2</sub>M data for IFT factors and dyneins in  
336 **Figure 3B** and **Figure 5C**, for example. Once again, exocyst components provided a control  
337 cohort with no components registering enrichment in the G<sub>1</sub>, S phase or G<sub>2</sub>M pools following  
338 knockdown (**Figure 5C**).

339 The heat-map in **Figure 5D** shows the data for all five sorted pools for the cohorts  
340 described above and for additional knockdowns enriched in the G<sub>1</sub> or S phase (tRNA  
341 synthetases), S phase (core histones) or G<sub>2</sub>M pools (PSP1, DNA polymerase suppressor 1),  
342 or not enriched in any pool. These latter sets provide further controls that do not appear to  
343 have specific impacts on cell cycle progression, including the mitochondria RNA editing  
344 accessory complex MRB1 (60) and the mitochondrial ATP synthase complex V (61). Thus,  
345 we identify a number of protein complexes, pathways and regulatory factors that are  
346 specifically required for progressive steps through the trypanosome cell cycle.

347

### 348 **Pathways and protein complexes associated with G<sub>1</sub>, S phase and G<sub>2</sub>M defects**

349 We next explored some of the cohorts of hits described above in more detail.  
350 Glycolytic enzymes are particularly prominent amongst knockdowns that accumulate in G<sub>1</sub>  
351 and we illustrate the RIT-seq profiling data for these enzymes in **Figure 6A**. Seven of eleven  
352 glycolytic enzyme knockdowns register >25% overrepresentation in the G<sub>1</sub> pool; hexokinase  
353 (Tb927.10.2010), phosphofructokinase (Tb927.3.3270), aldolase (see **Figure 2C**),  
354 triosephosphate isomerase (Tb927.11.5520), glyceraldehyde 3-phosphate dehydrogenase  
355 (Tb927.6.4280), phosphoglycerate kinase C (Tb927.1.700) and pyruvate kinase  
356 (Tb927.10.14140). Glycolysis operates in peroxisome-like organelles known as glycosomes  
357 in trypanosomes and is thought to be the single source of ATP in bloodstream form cells  
358 (12). Glycolysis also provides metabolic intermediates that support nucleotide production.  
359 Notably, mammalian cell proliferation is accompanied by activation of glycolysis, and the  
360 Warburg effect relates to this phenomenon in oncology (62). Indeed, hexokinase regulates  
361 the G<sub>1</sub>/S checkpoint in tumour cells (63). The results are also consistent with the observation  
362 that *T. brucei* accumulate in G<sub>1</sub> or G<sub>0</sub> under growth-limiting conditions (64) or during  
363 differentiation to the non-dividing stumpy form (65), possibly reflecting a role for glucose  
364 sensing in differentiation (66). Notably, glycolytic enzymes are downregulated 6.7±/−5.2-fold



Figure 6

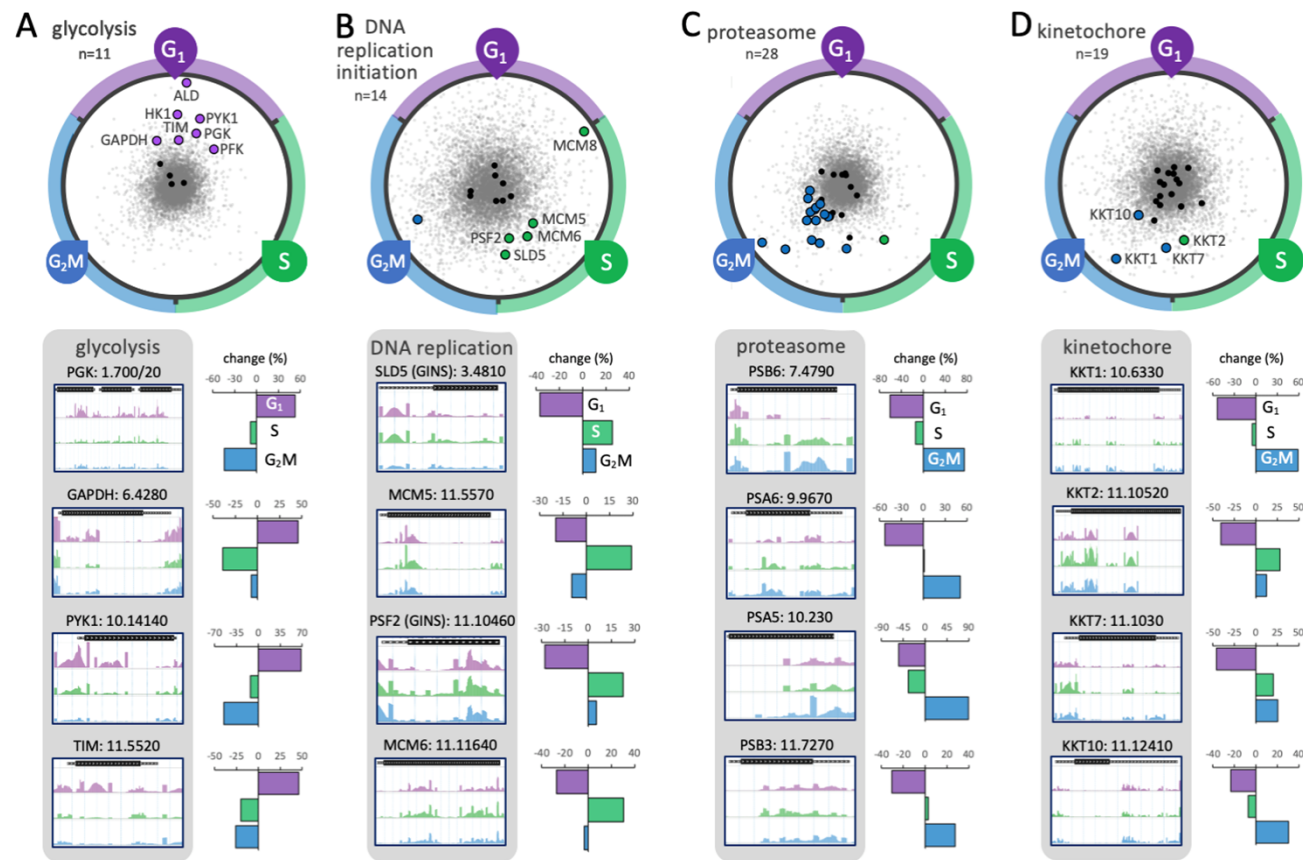

**Figure 6.** Protein complexes and pathways associated with  $G_1$ , S phase and  $G_2$ /mitosis defects. **(A)** The RadViz plot shows glycolytic enzyme knockdowns. Those that registered  $>25\%$  overrepresented read-counts in the  $G_1$  category are indicated, purple. Black data-points indicate other genes from each cohort. Grey data-points indicate all other genes. The read-mapping profiles and relative read-counts in the lower panel show example hits. **(B)** As in a but for DNA replication initiation factor knockdowns that registered  $>25\%$  overrepresented read-counts in the S phase category, indicated in green. **(C)** As in a but for proteasome component knockdowns that registered  $>25\%$  overrepresented read-counts in the  $G_2$ M category, indicated in blue. **(D)** As in a but for kinetochore component knockdowns that registered  $>25\%$  overrepresented read-counts in the S phase or  $G_2$ M categories, indicated in green or blue, respectively.

365 in stumpy-form cells (67). We conclude that, as in other organisms (68), there is metabolic  
366 control of the cell cycle and a nutrient sensitive restriction point in *T. brucei*, with glycolysis  
367 playing a role in the G<sub>1</sub> to S phase transition.

368 DNA replication initiation factors are particularly prominent amongst knockdowns that  
369 accumulate in S phase and we illustrate the RIT-seq profiling data for these factors in **Figure**  
370 **6B**. Five knockdowns that register >25% overrepresentation in the S phase pool are  
371 components of the eukaryotic replicative helicase, the CMG (Cdc45-MCM-GINS) complex.  
372 At the core of this complex is the minichromosome maintenance complex (MCM2-7), a  
373 helicase that unwinds the duplex DNA ahead of the moving replication fork (69).  
374 Identification of this subset of components suggests that these particular subunits are  
375 limiting for progression through S phase.

376 Proteasome components are particularly prominent amongst knockdowns that  
377 accumulate in G<sub>2</sub>M, and we illustrate the RIT-seq profiling data for this protein complex in  
378 **Figure 6C**. Sixteen of 28 proteasome component knockdowns register >25%  
379 overrepresentation in the G<sub>2</sub>M pool. This output suggests that the *T. brucei* proteasome is  
380 most likely responsible for degrading cell cycle regulators, such as poly-ubiquitinated cyclins,  
381 which are known to control cell cycle checkpoints in other eukaryotes. Candidate target  
382 cyclins in *T. brucei* include: cyclin 6 (CYC6, Tb927.11.16720), degradation of which is  
383 required for mitosis (70); cyclin-like CFB2 (Tb927.1.4650), required for cytokinesis (71);  
384 cyclin 2 (CYC2, Tb927.6.1460) or cyclin 3 (CYC3, Tb927.6.1460), which have short half-  
385 lives and a candidate destruction box motif in the case of CYC3 (72).

386 Kinetochores components (17) are also amongst knockdowns that accumulate in G<sub>2</sub>M  
387 and we illustrate the RIT-seq profiling data for this protein complex in **Figure 6D**. Although  
388 knockdown of KKT2 (Tb927.10.10520), a putative kinase, registered overrepresentation in  
389 the S phase pool, KKT1 (Tb927.10.6330), KKT7 (Tb927.11.1030) and KKT10 (CLK1,  
390 Tb927.11.12410) knockdowns registered >25% overrepresentation in the G<sub>2</sub>M pool,  
391 suggesting that these particular kinetochores components, which all display temporal patterns  
392 of phosphorylation from S phase to G<sub>2</sub>M (21), are limiting for progression through mitosis.  
393 Notably, KKT10 is a kinase responsible for phosphorylation of KKT7, which is required for  
394 the metaphase to anaphase transition (73); as well as for the phosphorylation of KKT1,  
395 which is required for kinetochores assembly (74). These findings are consistent with the view  
396 that kinetochores components control a non-canonical spindle checkpoint in trypanosomes  
397 (73).

398

### 399 **RBPs, kinases and hypothetical proteins associated with G<sub>1</sub>, S phase and G<sub>2</sub>M defects**

400 Widespread polycistronic transcription in trypanosomatids places great emphasis on  
401 post-transcriptional controls and, consistent with this, knockdowns overrepresented in the

Figure 7

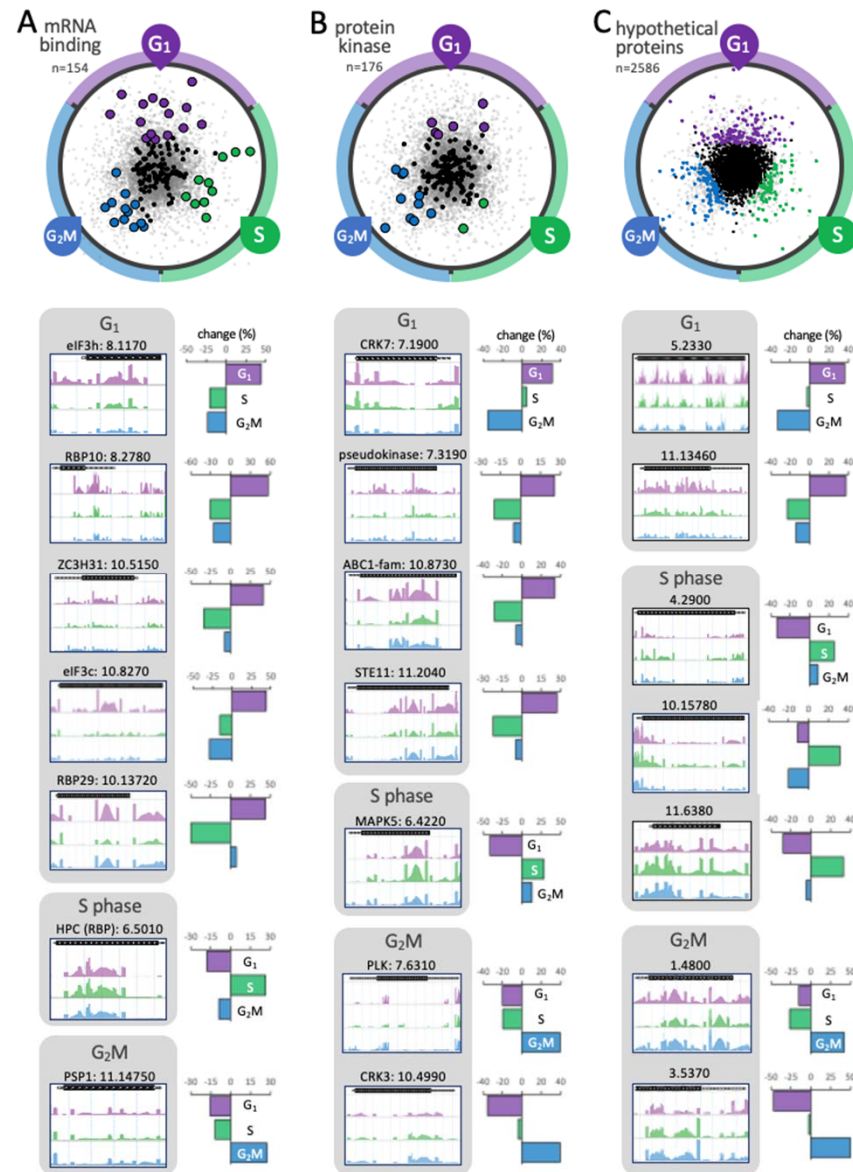

**Figure 7.** RBPs kinases and hypothetical proteins associated with gap and S phase defects. **(A)** The RadViz plot shows mRNA binding protein knockdowns (RBPs). Those that registered >25% overrepresented read-counts in the G<sub>1</sub>, S phase or G<sub>2</sub>M categories are indicated, in purple, green and blue, respectively. The read-mapping profiles and relative read-counts in the lower panels show example hits. **(B)** As in a but for protein kinase knockdowns. **(C)** As in a but for hypothetical (conserved) protein knockdowns.

402 G<sub>1</sub>, S phase and G<sub>2</sub>M pools revealed many putative mRNA binding proteins (RBPs) and  
403 kinases. Indeed, RBPs are significantly enriched amongst knockdowns that registered G<sub>1</sub>, S  
404 phase or G<sub>2</sub>M cell cycle defects ( $\chi^2$  test,  $p = 7^{-5}$ ). We show the RIT-seq profiling data for  
405 seven RBP knockdowns that register >25% overrepresentation in these pools (**Figure 7A**).  
406 These include knockdowns for two components of the translation initiation factor, eIF3,  
407 linked to accumulation in G<sub>1</sub> (Tb927.8.1170; Tb927.10.8270). Proposed regulatory functions  
408 for eIF3 include reinitiation of translation on polycistronic mRNAs and as a substrate for  
409 translation regulatory kinases (75). The RBP10 (Tb927.8.2780), RBP29 (Tb927.10.13720)  
410 and ZC3H31 (Tb927.10.5150) knockdowns were also enriched in G<sub>1</sub>. RBP10, in particular,  
411 has been characterised in some detail and promotes the bloodstream form state (76). Thus,  
412 the RIT-seq cell cycle screen implicated a number of specific RBPs in post-transcriptional  
413 control of cell cycle progression, most likely through modulation of mRNA stability and/or  
414 translation of cell cycle regulators.

415 We show data for several protein kinases above, linked to enriched >4C (**Figure 3D**),  
416 sub-2C (**Figure 4**), S phase or G<sub>2</sub>M (**Figure 6D**) phenotypes, and now show the RIT-seq  
417 profiling data for seven additional protein kinase knockdowns that register >25%  
418 overrepresentation in the G<sub>1</sub>, S phase or G<sub>2</sub>M pools (**Figure 7B**). These include knockdowns  
419 for CRK7 (Tb927.7.1900), linked to accumulation in G<sub>1</sub>; MAPK5 (Tb927.6.4220), linked to  
420 accumulation in S phase and polo-like kinase (PLK, Tb927.7.6310) and cdc2-related kinase  
421 3 (CRK3, Tb927.10.4990), linked to accumulation in G<sub>2</sub>M. PLK was previously shown to  
422 control cell morphology, furrow ingression and cytokinesis (77-79), while CRK3 was shown  
423 to play a role in G<sub>2</sub>M progression in bloodstream form *T. brucei* (42,80).

424 Finally, we analysed genes encoding proteins annotated as hypothetical (conserved).  
425 Despite excellent progress in genome annotation, 35% of the non-redundant gene-set in *T.*  
426 *brucei* retain this annotation, amounting to >2,500 genes. We show data for more than  
427 twenty of these knockdowns above, linked to enriched >4C (**Figure 3—figure supplement**  
428 **1**) or sub-2C (**Figure 4**) phenotypes, and we identify additional hypothetical (conserved)  
429 protein knockdowns that register >25% overrepresentation in the G<sub>1</sub>, S phase or G<sub>2</sub>M pools  
430 RIT-seq profiling data are shown for seven examples in **Figure 7C** and for twenty four  
431 examples in **Figure 7 – figure supplement 1**. Amongst fifty-four other examples of  
432 knockdowns shown in **Figure 7—figure supplement 1**, are alternative oxidase  
433 (Tb927.10.7090) (81), linked to G<sub>1</sub> enrichment; tRNA synthetases linked to G<sub>1</sub> (Trp,  
434 Tb927.3.5580; His, Tb927.6.2060) or S phase enrichment (Glu, Tb927.6.4590; Lys,  
435 Tb927.8.1600); kinesins linked to S phase (Tb927.7.7120) or G<sub>2</sub>M enrichment, including  
436 both chromosomal passenger complex kinesins (26) (Tb927.11.2880, KIN-A and  
437 Tb927.7.5040, KIN-B) and KIN-G (Tb927.6.1770); CYC6 (25,82), CFB2 (71), centrin 3  
438 (Tb927.10.8710) (83) and, finally, both components of the histone chaperone FACT

439 (facilitates chromatin transcription) complex (84) Spt16 (Tb927.3.5620) and Pob3  
440 (Tb927.10.14390), linked to G<sub>2</sub>M enrichment. Notably, the FACT complex has been linked to  
441 centromere function in human cells (85).

442

### 443 **Linking cell cycle regulated transcripts and proteins to cell cycle progression defects**

444 Some factors required for cell cycle progression are themselves cell cycle regulated.  
445 To identify some of these factors, we compared our functional assignment data with  
446 quantitative transcriptome (19), proteome (20) and phosphoproteome (21) cell cycle profiling  
447 data. An initial survey of all 1,158 genes that registered a cell cycle defect here (see [Figure](#)  
448 [2D](#)) revealed significant enrichment of cell cycle regulated mRNAs (overlap = 105 of 485,  $\chi^2$   
449  $p = 8.5^{-4}$ ), as well as proteins displaying cell cycle regulated phosphorylation (overlap = 106  
450 of 547,  $\chi^2$   $p = 0.035$ ). It is important to note here, however, and for the analyses below, that  
451 these transcriptome and (phospho)proteome datasets were derived from insect stage *T.*  
452 *brucei*, meaning that regulation may differ in some cases in bloodstream *T. brucei* cells used  
453 for RIT-seq analysis here.

454 Specific transcripts required for cell cycle progression are likely upregulated prior to  
455 peak demand for the encoded protein, and we found evidence to support this view. For  
456 example, transcripts upregulated in late G<sub>1</sub> or in S phase were enriched amongst those  
457 knockdowns linked to accumulation in the G<sub>2</sub>M pool here ( $\chi^2$   $p = 3.3^{-3}$  and  $p = 1.1^{-2}$   
458 respectively); G<sub>1</sub> upregulated transcripts included, for example, both components of the  
459 FACT complex (see [Figure 7—figure supplement 1](#)). In addition, S phase and G<sub>2</sub>M  
460 upregulated transcripts, including those encoding multiple flagellum-associated proteins,  
461 were enriched amongst knockdowns linked to accumulation in the >4C pool ( $\chi^2$   $p = 4.6^{-18}$   
462 and  $p = 2.4^{-5}$  respectively).

463 Although the overlap between cell cycle regulated proteins (20) and those  
464 knockdowns that registered a cell cycle defect here failed to achieve significance (overlap =  
465 71 of 367,  $\chi^2$   $p = 0.09$ ), cell cycle regulated proteins do appear to be required for progression  
466 through specific stages of the cell cycle. For example, multiple glycolytic enzymes  
467 upregulated in G<sub>1</sub> were linked to accumulation in the G<sub>1</sub> pool following knockdown ( $\chi^2$   $p =$   
468  $7.9^{-11}$ ). In addition, proteins highly upregulated in G<sub>2</sub> and M were linked to accumulation in  
469 the G<sub>2</sub>M ( $\chi^2$   $p = 1.8^{-8}$ ) or >4C pools ( $\chi^2$   $p = 8.9^{-9}$ ) following knockdown, including multiple  
470 kinetochore and chromosomal passenger complex components, respectively.

471 In terms of specific cell cycle regulated genes/proteins, we focused on those that  
472 previously registered a significant loss of fitness following knockdown (23) and now with a  
473 RIT-seq based cell cycle progression functional assignment. Examples include putative  
474 RBPs of the DNA polymerase suppressor 1 (PSP1) family, which display mRNA

475 upregulation in G<sub>1</sub>, protein upregulation in S phase, cell cycle regulated phosphorylation and  
476 accumulation in G<sub>2</sub>M following knockdown (see [Figure 5D](#) and [Figure 7A](#)). The kinetochore  
477 components, KKT1 and KKT7, and also CRK3, all display mRNA upregulation in S phase,  
478 protein upregulation in G<sub>2</sub> and M, cell cycle regulated phosphorylation and accumulation in  
479 G<sub>2</sub>M following knockdown (see [Figure 6D](#) and [Figure 7B](#)); KKT10 and CYC6 report a  
480 similar profile (see [Figure 6D](#)), except for the mRNA regulation component. The cytokinesis  
481 initiation factors, CIF1 and CIF2, also display mRNA upregulation in S phase, protein  
482 upregulation in G<sub>2</sub> and M and cell cycle regulated phosphorylation, but instead accumulation  
483 in the >4C pool following knockdown (see [Figure 3E](#)). Finally, the chromosomal passenger  
484 complex components, CPC1 and AUK1, as well as furrow localized FRW1, report mRNA  
485 and protein upregulation in G<sub>2</sub>M and accumulation in the >4C pool following knockdown (see  
486 [Figure 3E](#)). Thus, several regulators linked to specific cell cycle progression defects by RIT-  
487 seq profiling, are themselves regulated.

## 488 Discussion

489 Despite intense interest and study (13,15), many cell cycle regulators in  
490 trypanosomatids remain to be identified and much remains to be learned about cell cycle  
491 control and progression in these parasites. DNA staining followed by flow cytometry is a  
492 widely used approach for quantifying cellular DNA content and analysing cell cycle  
493 distribution across otherwise asynchronous populations. Here, we combined genome scale  
494 loss-of-function genetic screening with flow cytometry in bloodstream form African  
495 trypanosomes and identify hundreds of genes required for progression through specific  
496 stages of the cell cycle.

497 Functional annotation of the trypanosomatid genomes will continue to benefit from  
498 novel high-throughput functional analyses, and RNAi-mediated knockdown has proven to be  
499 a powerful approach for *T. brucei*. RIT-seq profiling provides data for almost every gene and,  
500 using this approach, we previously described genome-scale loss-of-fitness data (23).  
501 Amongst 3117 knockdowns that scored a significant loss-of-fitness in bloodstream-form cells  
502 in that screen (42% of all genes analysed) were genes encoding all 18 intraflagellar transport  
503 complex subunits ( $\chi^2 p = 1^{-6}$ ), 12 of 13 dynein heavy-chains ( $\chi^2 p = 4^{-4}$ ), all 8 TCP-1  
504 chaperone components ( $\chi^2 p = 1^{-3}$ ), 27 of 30 nucleoporins ( $\chi^2 p = 2^{-7}$ ), all eleven glycolytic  
505 enzymes ( $\chi^2 p = 2^{-4}$ ) and 30 of 31 proteasome subunits ( $\chi^2 p = 2^{-9}$ ). This set also included 18  
506 of 19 kinetochore proteins ( $\chi^2 p = 6^{-6}$ ), only later identified as components of this essential  
507 complex (17). With this study, we now link many of these genes and many more to specific  
508 cell cycle defects following RNAi knockdown. A large number of flagellar protein  
509 knockdowns, in particular, yield cells with excess DNA, suggesting that DNA replication  
510 typically continues following failure to complete cytokinesis. We identified a number of  
511 pathways and protein complexes that impact cell cycle progression, such as glycolysis (G<sub>1</sub>/S  
512 transition) and the proteasome (likely G<sub>2</sub>/M transition). We also identify many mRNA binding  
513 proteins and protein kinases implicated in control of cell cycle progression. Notably, we link  
514 multiple known potential and promising drug targets to cell cycle progression defects, such  
515 as glycolytic enzymes (86), the proteasome (87), kinetochore kinases (74,88) and other  
516 kinases (89).

517 Prior cell cycle studies have often focused on trypanosome orthologues of known  
518 regulators from other eukaryotes. Since genome-scale profiling is unbiased, it presents the  
519 opportunity to uncover divergent as well as novel factors and regulators that impact cell  
520 cycle progression. Accordingly, we link many previously uncharacterised and hypothetical  
521 proteins of unknown function to specific cell cycle progression defects. Thus, we uncover  
522 mechanisms with an ancient origin in a common eukaryotic ancestor and others likely

523 reflecting trypanosomatid-specific biology. We also compared our functional data with cell  
524 cycle regulated transcriptome and (phospho)proteome datasets.

525 The digital dataset provided in [Supplementary File 1](#) facilitates further interrogation  
526 and further analysis of the genome-scale cell cycle RIT-seq data. We have also made the  
527 data available via an interactive, open access, online data visualization tool, which allows  
528 searching and browsing of the data (see [Figure 2—figure supplement 2](#)). Comparison with  
529 existing and new datasets, including with high-throughput subcellular localisation data (90)  
530 [www.tryptag.org](http://www.tryptag.org), should also facilitate future studies. Since high-throughput genetic screens  
531 typically yield a proportion of false positive ‘hits’, we do urge some caution, however, in  
532 particular where outputs are predominantly generated by a single RIT-seq fragment. On the  
533 other hand, there are knockdowns in the current dataset that show specific cell cycle phase  
534 enrichment yet fail to register a sufficient enrichment to surpass the thresholds applied  
535 above. Considering both of these points, we hope that the digital dataset and the online  
536 database will serve as valuable resources. Since other important trypanosomatid parasites,  
537 including *Trypanosoma cruzi* and *Leishmania*, share a high degree of conservation and  
538 synteny with *T. brucei* (91), the current datasets can also assist and inform studies on other  
539 trypanosomatids.

540 In summary, we report RNAi induced cell cycle defects at a genomic scale and  
541 identify the *T. brucei* genes that underlie these defects. The outputs confirm known roles in  
542 cell cycle progression and provide functional annotation for many additional genes, including  
543 many with no prior functional assignment and many that are trypanosomatid-specific. As  
544 such, the data not only improve our understanding of cell cycle progression in these  
545 important and divergent pathogens but should also accelerate further discovery. Taken  
546 together, our findings further facilitate genome annotation, drug-target prioritisation and  
547 provide comprehensive genetic evidence for the protein complexes, pathways and  
548 regulatory factors that coordinate progression through the trypanosome cell cycle.



## 549 **Materials and Methods**

550

### 551 ***T. brucei* RNAi library growth and manipulation**

552 The bloodstream form *T. brucei* RNAi library (22) was thawed in HMI-11 containing 1  $\mu\text{g.ml}^{-1}$   
553 of blasticidin and 0.2  $\mu\text{g.ml}^{-1}$  of phleomycin and incubated at 37°C in 5% CO<sub>2</sub>. After  
554 approximately 48 h, six flasks, each containing 2 x 10<sup>7</sup> cells in 150 ml of HMI-11 as above,  
555 were prepared; 1  $\mu\text{g.ml}^{-1}$  of tetracycline was added to five of them, while one served as the  
556 non-induced control. The cells were grown under these conditions for 24 h and then  
557 harvested by centrifugation for 10 min at 1000 g. Cells from each flask were then re-  
558 suspended in 25 ml of 1x PBS (pH 7.0) supplemented with 5 mM EDTA and 1 % FBS  
559 (“supplemented PBS”), centrifuged again for 10 min at 1000 g, and then re-suspended in 0.5  
560 ml of supplemented PBS. To each cell suspension, 9.5 ml of 1 % formaldehyde in  
561 supplemented PBS was added dropwise, with regular vortexing. The cells were incubated  
562 for a further 10 min at room temperature and then washed twice in 10 ml of supplemented  
563 PBS using centrifugation as above. The cells were finally re-suspended at 2.5 x 10<sup>7</sup> per ml in  
564 supplemented PBS and were subsequently stored at 4°C, in the dark.

565

### 566 **Flow cytometry**

567 Fixed cells, 3 x 10<sup>8</sup> Tet-induced and 10<sup>7</sup> uninduced, were centrifuged for 10 min at 1000 g,  
568 and re-suspended in 10 ml of supplemented PBS containing 0.01% Triton X-100 (Sigma  
569 Aldrich). The cells were incubated for 30 min at room temperature, centrifuged for 10 min at  
570 700 g and washed once in 10 ml of supplemented PBS. The cells were then re-suspended in  
571 4 ml of supplemented PBS containing 10  $\mu\text{g.ml}^{-1}$  of propidium iodide (Sigma Aldrich) and  
572 100  $\mu\text{g.ml}^{-1}$  of RNaseA (Sigma Aldrich), and incubated for 45 min at 37°C, in the dark; cells  
573 were subsequently kept on ice and in the dark. Immediately prior to sorting, the Tet-induced  
574 cells were filtered (Falcon Cup-type filter, 50  $\mu\text{m}$  mesh, BD™ Medimachine) into 5 ml  
575 polystyrene round-bottom tubes (BD Falcon). Cells were sorted using the BD Influx™  
576 (Becton Dickinson) cell sorter, with BD FACSort™ software, at the Flow Cytometry and Cell  
577 Sorting Facility in the School of Life Sciences, University of Dundee. The cells were sorted  
578 into pools of <2C (~8 x 10<sup>5</sup> cells), 2C (G<sub>1</sub>, 1 x 10<sup>7</sup> cells), 2-4C (S, 1 x 10<sup>7</sup> cells), 4C (G<sub>2</sub>M, 1 x  
579 10<sup>7</sup> cells) and >4C (~5 x 10<sup>5</sup> cells) based on their DNA content, and collected into 50 ml  
580 Falcon tubes (BD Falcon); sorting time was approx. 4 h. The 2C, 2-4C and 4C sorted  
581 samples were then run on a FACS LSR Fortessa flow cytometry analyser for a post-sorting  
582 quality check. FlowJo v10 was used for data analysis and visualisation.

583

### 584 **RNA interference target amplification**

585

586 The five pools of Tet-induced, sorted cells as well as uninduced or induced, but unsorted  
587 cells, were lysed overnight at 56°C in 50% (v/v) of Buffer AL (Qiagen) and 0.5 mg.ml<sup>-1</sup> of  
588 Proteinase K (Qiagen), to reverse formaldehyde crosslinking. Genomic DNA was then  
589 extracted using the DNeasy Blood and Tissue DNA extraction kit (Qiagen), according to the  
590 manufacturer's instructions, with the exception that each sample was eluted in 50 µl of  
591 Buffer AE. The whole sample (range = 140-840 ng) was used for PCR, in a 100 µl reaction,  
592 using OneTaq (NEB), and the Lib3F (CCTCGAGGGCCAGTGAG) and Lib3R  
593 (ATCAAGCTTGGCCTGTGAG) primers and with the following programme: 94°C for 4 min,  
594 followed by 27 cycles of 94°C for 30 sec, 55°C for 30 sec and 68°C for 2 min and 10 sec,  
595 and a final extension of 68°C for 5 min. The PCR products were then purified using the  
596 Qiaquick PCR extraction kit (Qiagen), as per the manufacturer's instructions, and eluted in  
597 30 µl of nuclease-free water (Ambion); two columns per sample.

598

#### 599 **RIT-seq library preparation and sequencing**

600 Purified PCR products were used for library preparation and sequencing at the Tayside  
601 Centre for Genomic Analysis at the University of Dundee. The PCR products were  
602 fragmented using a Covaris M220 sonicator (20% duty factor, 75W peak/displayed power,  
603 60 seconds duration – 3 x 20 sec with intermittent spin down step, 18-20°C temperature;  
604 resulting in 250-300 bp enriched fragments), and the libraries were prepared using the  
605 Truseq Nano DNA Library Prep kit (Illumina). The samples were multiplexed, and sequenced  
606 on an Illumina NextSeq 500 platform, on a 150 cycle Output Cartridge v2, paired-end. Each  
607 library was run on 4 sequencing lanes. Base call, index deconvolution, trimming and QC  
608 were performed in BaseSpace using bcl2fastq2 Conversion Software v2.17.

609

#### 610 **RIT-seq data mapping and analysis**

611 The sequencing data analysis pipeline was adapted from (22). The FASTQ files with  
612 forward and reverse paired end reads (4 technical replicates for each samples) were  
613 concatenated and aligned to the reference genome v46 of *T. brucei* clone TREU927  
614 downloaded from TriTrypDB (28) using Bowtie2 (92), with the 'very-sensitive-local' pre-set  
615 alignment option. The alignments were converted to BAM format, reference sorted and  
616 indexed with SAMtools (93). The quality of alignments was evaluated with Qualimap 2 (94)  
617 using the bamqc and rnaseq options. The Qualimap 2 output files were aggregated with  
618 MultiQC (95) and inspected. The alignments were deduplicated with the Picard tools  
619 package using the MarkDuplicates function (<http://broadinstitute.github.io/picard/>); to  
620 minimise the potential for overrepresentation of the shortest RIT-seq fragments. Alignments

621 with properly paired reads were extracted with SAMtool view using the -f 2 option and  
622 parsed with a custom python script to extract the paired reads containing the barcode  
623 sequence (GTGAGGCCTCGCGA) in forward or reverse complement orientation. The  
624 genome coverage of the aligned reads was extracted from the bam files using bedtools (96)  
625 with the -bg option to output bedGraph files. The bedGraph files were visualized with the  
626 svist4get python package (97). Read counts for protein coding sequences and associated  
627 untranslated regions (where annotated) were determined from the bam files using  
628 featureCounts (98) and normalized to Transcripts Per Kilobase Million (TPM). Dimensionality  
629 reduction of the G<sub>1</sub>, S and G<sub>2</sub>M TPM values was performed with the radviz algorithm  
630 implemented in the pandas python package (99). The bash script containing the analysis  
631 pipeline, a conda environment specification file for its execution, the python script to extract  
632 barcoded reads and a basic usage example are available at GitHub  
633 ([https://github.com/mtinti/ritseq\\_cellcycle](https://github.com/mtinti/ritseq_cellcycle)). Data were subsequently analysed using a GO-  
634 slim set and Gene Ontology tools available via [tritypdb.org](http://tritypdb.org) and visualised using tools  
635 available at [huygens.science.uva.nl/PlotsOfData](http://huygens.science.uva.nl/PlotsOfData).

636 **Acknowledgements**

637 We thank R. Clark, A. Rennie and M. Lee of the Flow Cytometry and Cell Sorting Facility,  
638 which is supported by the Wellcome Trust (097418/Z/11/Z). We also thank L. Glover for  
639 advice on RNAi library manipulation, S. Hutchinson for advice on RIT-seq data analysis and  
640 J. Faria for fruitful discussions.

641

642 **Funding:** The work was funded by a Wellcome Trust Investigator Award to D.H.  
643 [100320/Z/12/Z]. The funders had no role in study design, data collection and interpretation,  
644 or the decision to submit the work for publication.

645

646 **Author contributions**

647 Catarina A. Marques, Conceptualization, Formal analysis, Investigation, Methodology,  
648 Writing—review and editing; Michele Tinti, Data curation, visualisation and analysis,  
649 Writing—review and editing; Andrew Cassidy, Investigation, Methodology; David Horn,  
650 Conceptualization, Formal analysis, Supervision, Funding acquisition, Project administration,  
651 Writing—original draft, Writing—review and editing.

652

653 **Author ORCIDs**

654 David Horn <http://orcid.org/0000-0001-5173-9284>

655 Catarina A. Marques <https://orcid.org/0000-0003-1324-5448>

656 Michele Tinti <https://orcid.org/0000-0002-0051-017X>

657

658 **Competing interests:** The authors declare that they have no competing interests.

659

660 **Data and materials availability:** High-throughput sequencing data generated for  
661 this study have been deposited in the Short Read Archive (SRA) at

662 <https://www.ncbi.nlm.nih.gov/sra/PRJNA641153> under primary accession number

663 PRJNA641153.

## 664 References

- 665 1. Harashima, H., Dissmeyer, N. and Schnittger, A. (2013) Cell cycle control across the  
666 eukaryotic kingdom. *Trends Cell Biol*, **23**, 345-356.
- 667 2. Pollard, T.D. and O'Shaughnessy, B. (2019) Molecular mechanism of mytokinesis.  
668 *Annu Rev Biochem*, **88**, 661-689.
- 669 3. Poon, R.Y. (2016) Cell cycle control: A system of interlinking oscillators. *Methods*  
670 *Mol Biol*, **1342**, 3-19.
- 671 4. Visconti, R., Della Monica, R. and Grieco, D. (2016) Cell cycle checkpoint in cancer:  
672 a therapeutically targetable double-edged sword. *J Exp Clin Cancer Res*, **35**, 153.
- 673 5. Buscher, P., Cecchi, G., Jamonneau, V. and Priotto, G. (2017) Human African  
674 trypanosomiasis. *Lancet*, **390**, 2397-2409.
- 675 6. Matthews, K.R. (2015) 25 years of African trypanosome research: From description  
676 to molecular dissection and new drug discovery. *Mol Biochem Parasitol*, **200**, 30-40.
- 677 7. Broadhead, R., Dawe, H.R., Farr, H., Griffiths, S., Hart, S.R., Portman, N., Shaw,  
678 M.K., Ginger, M.L., Gaskell, S.J., McKean, P.G. *et al.* (2006) Flagellar motility is  
679 required for the viability of the bloodstream trypanosome. *Nature*, **440**, 224-227.
- 680 8. Baron, D.M., Kabututu, Z.P. and Hill, K.L. (2007) Stuck in reverse: loss of LC1 in  
681 *Trypanosoma brucei* disrupts outer dynein arms and leads to reverse flagellar beat and  
682 backward movement. *J Cell Sci*, **120**, 1513-1520.
- 683 9. Bonnefoy, S., Watson, C.M., Kernohan, K.D., Lemos, M., Hutchinson, S., Poulter,  
684 J.A., Crinnion, L.A., Berry, I., Simmonds, J., Vasudevan, P. *et al.* (2018) Biallelic  
685 mutations in LRRC56, encoding a protein associated with intraflagellar transport,  
686 cause mucociliary clearance and laterality defects. *Am J Hum Genet*, **103**, 727-739.
- 687 10. Coutton, C., Vargas, A.S., Amiri-Yekta, A., Kherraf, Z.E., Ben Mustapha, S.F., Le  
688 Tanno, P., Wambergue-Legrand, C., Karaouzene, T., Martinez, G., Crouzy, S. *et al.*  
689 (2018) Mutations in CFAP43 and CFAP44 cause male infertility and flagellum  
690 defects in *Trypanosoma* and human. *Nat Commun*, **9**, 686.
- 691 11. Vincensini, L., Blisnick, T. and Bastin, P. (2011) [The importance of model  
692 organisms to study cilia and flagella biology]. *Biol Aujourd'hui*, **205**, 5-28.
- 693 12. Allmann, S. and Bringaud, F. (2017) Glycosomes: A comprehensive view of their  
694 metabolic roles in *T. brucei*. *Int J Biochem Cell Biol*, **85**, 85-90.
- 695 13. Wheeler, R.J., Gull, K. and Sunter, J.D. (2019) Coordination of the cell cycle in  
696 trypanosomes. *Annu Rev Microbiol*, **73**, 133-154.
- 697 14. Clayton, C. (2019) Regulation of gene expression in trypanosomatids: living with  
698 polycistronic transcription. *Open Biol*, **9**, 190072.
- 699 15. Zhou, Q., Hu, H. and Li, Z. (2014) New insights into the molecular mechanisms of  
700 mitosis and cytokinesis in trypanosomes. *Int Rev Cell Mol Biol*, **308**, 127-166.
- 701 16. Ploubidou, A., Robinson, D.R., Docherty, R.C., Ogbadoyi, E.O. and Gull, K. (1999)  
702 Evidence for novel cell cycle checkpoints in trypanosomes: kinetoplast segregation  
703 and cytokinesis in the absence of mitosis. *J Cell Sci*, **112 ( Pt 24)**, 4641-4650.
- 704 17. Akiyoshi, B. and Gull, K. (2014) Discovery of unconventional kinetochores in  
705 kinetoplastids. *Cell*, **156**, 1247-1258.
- 706 18. Marques, C.A. and McCulloch, R. (2018) Conservation and variation in strategies for  
707 DNA replication of kinetoplastid nuclear genomes. *Curr Genomics*, **19**, 98-109.
- 708 19. Archer, S.K., Inchaustegui, D., Queiroz, R. and Clayton, C. (2011) The cell cycle  
709 regulated transcriptome of *Trypanosoma brucei*. *PLoS One*, **6**, e18425.
- 710 20. Crozier, T.W.M., Tinti, M., Wheeler, R.J., Ly, T., Ferguson, M.A.J. and Lamond, A.I.  
711 (2018) Proteomic analysis of the cell cycle of procyclic form *Trypanosoma brucei*. *Mol*  
712 *Cell Proteomics*, **17**, 1184-1195.

- 713 21. Benz, C. and Urbaniak, M.D. (2019) Organising the cell cycle in the absence of  
714 transcriptional control: Dynamic phosphorylation co-ordinates the *Trypanosoma*  
715 *brucei* cell cycle post-transcriptionally. *PLoS Pathog*, **15**, e1008129.
- 716 22. Glover, L., Alsford, S., Baker, N., Turner, D.J., Sanchez-Flores, A., Hutchinson, S.,  
717 Hertz-Fowler, C., Berriman, M. and Horn, D. (2015) Genome-scale RNAi screens for  
718 high-throughput phenotyping in bloodstream-form African trypanosomes. *Nat Protoc*,  
719 **10**, 106-133.
- 720 23. Alsford, S., Turner, D.J., Obado, S.O., Sanchez-Flores, A., Glover, L., Berriman, M.,  
721 Hertz-Fowler, C. and Horn, D. (2011) High-throughput phenotyping using parallel  
722 sequencing of RNA interference targets in the African trypanosome. *Genome Res*, **21**,  
723 915-924.
- 724 24. Ngo, H., Tschudi, C., Gull, K. and Ullu, E. (1998) Double-stranded RNA induces  
725 mRNA degradation in *Trypanosoma brucei*. *Proc Natl Acad Sci U S A*, **95**, 14687-  
726 14692.
- 727 25. Hammarton, T.C., Clark, J., Douglas, F., Boshart, M. and Mottram, J.C. (2003) Stage-  
728 specific differences in cell cycle control in *Trypanosoma brucei* revealed by RNA  
729 interference of a mitotic cyclin. *J Biol Chem*, **278**, 22877-22886.
- 730 26. Li, Z., Umeyama, T. and Wang, C.C. (2008) The chromosomal passenger complex  
731 and a mitotic kinesin interact with the tousel-like kinase in trypanosomes to regulate  
732 mitosis and cytokinesis. *PLoS One*, **3**, e3814.
- 733 27. Kolev, N.G., Tschudi, C. and Ullu, E. (2011) RNA interference in protozoan  
734 parasites: achievements and challenges. *Eukaryot Cell*, **10**, 1156-1163.
- 735 28. Aslett, M., Aurrecochea, C., Berriman, M., Brestelli, J., Brunk, B.P., Carrington, M.,  
736 Depledge, D.P., Fischer, S., Gajria, B., Gao, X. *et al.* (2010) TriTrypDB: a functional  
737 genomic resource for the Trypanosomatidae. *Nucleic Acids Res*, **38**, D457-462.
- 738 29. Springer, A.L., Bruhn, D.F., Kinzel, K.W., Rosenthal, N.F., Zukas, R. and Klingbeil,  
739 M.M. (2011) Silencing of a putative inner arm dynein heavy chain results in flagellar  
740 immotility in *Trypanosoma brucei*. *Mol Biochem Parasitol*, **175**, 68-75.
- 741 30. Gassen, A., Brechtefeld, D., Schandry, N., Arteaga-Salas, J.M., Israel, L., Imhof, A.  
742 and Janzen, C.J. (2012) DOT1A-dependent H3K76 methylation is required for  
743 replication regulation in *Trypanosoma brucei*. *Nucleic Acids Res*, **40**, 10302-10311.
- 744 31. Choe, K.N. and Moldovan, G.L. (2017) Forging ahead through darkness: PCNA, still  
745 the principal conductor at the replication fork. *Mol Cell*, **65**, 380-392.
- 746 32. Valenciano, A.L., Ramsey, A.C. and Mackey, Z.B. (2015) Deviating the level of  
747 proliferating cell nuclear antigen in *Trypanosoma brucei* elicits distinct mechanisms  
748 for inhibiting proliferation and cell cycle progression. *Cell Cycle*, **14**, 674-688.
- 749 33. Rudd, S.G., Glover, L., Jozwiakowski, S.K., Horn, D. and Doherty, A.J. (2013) PPL2  
750 translesion polymerase is essential for the completion of chromosomal DNA  
751 replication in the African trypanosome. *Mol Cell*, **52**, 554-565.
- 752 34. Ralston, K.S., Lerner, A.G., Diener, D.R. and Hill, K.L. (2006) Flagellar motility  
753 contributes to cytokinesis in *Trypanosoma brucei* and is modulated by an  
754 evolutionarily conserved dynein regulatory system. *Eukaryot Cell*, **5**, 696-711.
- 755 35. Boehm, C.M., Obado, S., Gadelha, C., Kaupisch, A., Manna, P.T., Gould, G.W.,  
756 Munson, M., Chait, B.T., Rout, M.P. and Field, M.C. (2017) The trypanosome  
757 exocyst: A conserved structure revealing a new role in endocytosis. *PLoS Pathog*, **13**,  
758 e1006063.
- 759 36. Wang, D.Y., Kamuda, K., Montoya, G. and Mesa, P. (2020) The TRiC/CCT  
760 chaperonin and its role in uncontrolled proliferation. *Adv Exp Med Biol*, **1243**, 21-40.

- 761 37. Zhang, X., Hu, H., Lun, Z.R. and Li, Z. (2019) Functional analyses of an axonemal  
762 inner-arm dynein complex in the bloodstream form of *Trypanosoma brucei* uncover  
763 its essential role in cytokinesis initiation. *Mol Microbiol*, **112**, 1718-1730.
- 764 38. Sunter, J.D., Varga, V., Dean, S. and Gull, K. (2015) A dynamic coordination of  
765 flagellum and cytoplasmic cytoskeleton assembly specifies cell morphogenesis in  
766 trypanosomes. *J Cell Sci*, **128**, 1580-1594.
- 767 39. Hu, H., Majneri, P., Li, D., Kurasawa, Y., An, T., Dong, G. and Li, Z. (2017)  
768 Functional analyses of the CIF1-CIF2 complex in trypanosomes identify the structural  
769 motifs required for cytokinesis. *J Cell Sci*, **130**, 4108-4119.
- 770 40. Li, Z., Lee, J.H., Chu, F., Burlingame, A.L., Gunzl, A. and Wang, C.C. (2008)  
771 Identification of a novel chromosomal passenger complex and its unique localization  
772 during cytokinesis in *Trypanosoma brucei*. *PLoS One*, **3**, e2354.
- 773 41. Li, Z. and Wang, C.C. (2006) Changing roles of aurora-B kinase in two life cycle  
774 stages of *Trypanosoma brucei*. *Eukaryot Cell*, **5**, 1026-1035.
- 775 42. Jones, N.G., Thomas, E.B., Brown, E., Dickens, N.J., Hammarton, T.C. and Mottram,  
776 J.C. (2014) Regulators of *Trypanosoma brucei* cell cycle progression and  
777 differentiation identified using a kinome-wide RNAi screen. *PLoS Pathog*, **10**,  
778 e1003886.
- 779 43. Hu, H., Liu, Y., Zhou, Q., Siegel, S. and Li, Z. (2015) The centriole cartwheel protein  
780 SAS-6 in *Trypanosoma brucei* is required for probasal body biogenesis and flagellum  
781 assembly. *Eukaryot Cell*, **14**, 898-907.
- 782 44. Zhang, X., An, T., Pham, K.T.M., Lun, Z.R. and Li, Z. (2019) Functional analyses of  
783 cytokinesis regulators in bloodstream stage *Trypanosoma brucei* parasites identify  
784 functions and regulations specific to the life cycle stage. *mSphere*, **4**.
- 785 45. Dean, S., Moreira-Leite, F., Varga, V. and Gull, K. (2016) Cilium transition zone  
786 proteome reveals compartmentalization and differential dynamics of ciliopathy  
787 complexes. *Proc Natl Acad Sci U S A*, **113**, E5135-5143.
- 788 46. Dang, H.Q., Zhou, Q., Rowlett, V.W., Hu, H., Lee, K.J., Margolin, W. and Li, Z.  
789 (2017) Proximity interactions among basal body components in *Trypanosoma brucei*  
790 identify novel regulators of basal body biogenesis and inheritance. *mBio*, **8**.
- 791 47. An, T. and Li, Z. (2018) An orphan kinesin controls trypanosome morphology  
792 transitions by targeting FLAM3 to the flagellum. *PLoS Pathog*, **14**, e1007101.
- 793 48. Hu, L., Hu, H. and Li, Z. (2012) A kinetoplastid-specific kinesin is required for  
794 cytokinesis and for maintenance of cell morphology in *Trypanosoma brucei*. *Mol*  
795 *Microbiol*, **83**, 565-578.
- 796 49. DeGrasse, J.A., DuBois, K.N., Devos, D., Siegel, T.N., Sali, A., Field, M.C., Rout,  
797 M.P. and Chait, B.T. (2009) Evidence for a shared nuclear pore complex architecture  
798 that is conserved from the last common eukaryotic ancestor. *Mol Cell Proteomics*, **8**,  
799 2119-2130.
- 800 50. Benz, C., Clucas, C., Mottram, J.C. and Hammarton, T.C. (2012) Cytokinesis in  
801 bloodstream stage *Trypanosoma brucei* requires a family of katanins and spastin.  
802 *PLoS One*, **7**, e30367.
- 803 51. Ralston, K.S. and Hill, K.L. (2006) Trypanin, a component of the flagellar dynein  
804 regulatory complex, is essential in bloodstream form African trypanosomes. *PLoS*  
805 *Pathog*, **2**, e101.
- 806 52. May, S.F., Peacock, L., Almeida Costa, C.I., Gibson, W.C., Tetley, L., Robinson,  
807 D.R. and Hammarton, T.C. (2012) The *Trypanosoma brucei* AIR9-like protein is  
808 cytoskeleton-associated and is required for nucleus positioning and accurate cleavage  
809 furrow placement. *Mol Microbiol*, **84**, 77-92.

- 810 53. Portman, N. and Gull, K. (2014) Identification of paralogous life-cycle stage specific  
811 cytoskeletal proteins in the parasite *Trypanosoma brucei*. *PLoS One*, **9**, e106777.
- 812 54. Dostalova, A., Kaser, S., Cristodero, M. and Schimanski, B. (2013) The nuclear  
813 mRNA export receptor Mex67-Mtr2 of *Trypanosoma brucei* contains a unique and  
814 essential zinc finger motif. *Mol Microbiol*, **88**, 728-739.
- 815 55. Marques, C.A., Tiengwe, C., Lemgruber, L., Damasceno, J.D., Scott, A., Paape, D.,  
816 Marcello, L. and McCulloch, R. (2016) Diverged composition and regulation of the  
817 *Trypanosoma brucei* origin recognition complex that mediates DNA replication  
818 initiation. *Nucleic Acids Res*, **44**, 4763-4784.
- 819 56. Gluenz, E., Sharma, R., Carrington, M. and Gull, K. (2008) Functional  
820 characterization of cohesin subunit SCC1 in *Trypanosoma brucei* and dissection of  
821 mutant phenotypes in two life cycle stages. *Mol Microbiol*, **69**, 666-680.
- 822 57. Dang, H.Q. and Li, Z. (2011) The Cdc45.Mcm2-7.GINS protein complex in  
823 trypanosomes regulates DNA replication and interacts with two Orc1-like proteins in  
824 the origin recognition complex. *J Biol Chem*, **286**, 32424-32435.
- 825 58. Shyh-Chang, N., Locasale, J.W., Lyssiotis, C.A., Zheng, Y., Teo, R.Y.,  
826 Ratanasirintrao, S., Zhang, J., Onder, T., Unternaehrer, J.J., Zhu, H. *et al.* (2013)  
827 Influence of threonine metabolism on S-adenosylmethionine and histone methylation.  
828 *Science*, **339**, 222-226.
- 829 59. Peacock, L., Bailey, M., Carrington, M. and Gibson, W. (2014) Meiosis and haploid  
830 gametes in the pathogen *Trypanosoma brucei*. *Curr Biol*, **24**, 181-186.
- 831 60. Ammerman, M.L., Downey, K.M., Hashimi, H., Fisk, J.C., Tomasello, D.L.,  
832 Faktorova, D., Kafkova, L., King, T., Lukes, J. and Read, L.K. (2012) Architecture of  
833 the trypanosome RNA editing accessory complex, MRB1. *Nucleic Acids Res*, **40**,  
834 5637-5650.
- 835 61. Zikova, A., Schnauffer, A., Dalley, R.A., Panigrahi, A.K. and Stuart, K.D. (2009) The  
836 F0F1-ATP synthase complex contains novel subunits and is essential for procyclic  
837 *Trypanosoma brucei*. *PLoS Pathog*, **5**, e1000436.
- 838 62. Tudzarova, S., Colombo, S.L., Stoeber, K., Carcamo, S., Williams, G.H. and  
839 Moncada, S. (2011) Two ubiquitin ligases, APC/C-Cdh1 and SKP1-CUL1-F (SCF)-  
840 beta-TrCP, sequentially regulate glycolysis during the cell cycle. *Proc Natl Acad Sci*  
841 *U S A*, **108**, 5278-5283.
- 842 63. Hu, J.W., Sun, P., Zhang, D.X., Xiong, W.J. and Mi, J. (2014) Hexokinase 2 regulates  
843 G1/S checkpoint through CDK2 in cancer-associated fibroblasts. *Cell Signal*, **26**,  
844 2210-2216.
- 845 64. Morgan, G.A., Hamilton, E.A. and Black, S.J. (1996) The requirements for G1  
846 checkpoint progression of *Trypanosoma brucei* S 427 clone 1. *Mol Biochem*  
847 *Parasitol*, **78**, 195-207.
- 848 65. Silvester, E., McWilliam, K.R. and Matthews, K.R. (2017) The cytological events and  
849 molecular control of life cycle development of *Trypanosoma brucei* in the  
850 mammalian bloodstream. *Pathogens*, **6**.
- 851 66. Qiu, Y., Milanes, J.E., Jones, J.A., Noorai, R.E., Shankar, V. and Morris, J.C. (2018)  
852 Glucose signaling is important for nutrient adaptation during differentiation of  
853 pleomorphic African trypanosomes. *mSphere*, **3**.
- 854 67. Naguleswaran, A., Doiron, N. and Roditi, I. (2018) RNA-Seq analysis validates the  
855 use of culture-derived *Trypanosoma brucei* and provides new markers for mammalian  
856 and insect life-cycle stages. *BMC Genomics*, **19**, 227.
- 857 68. Kalucka, J., Missiaen, R., Georgiadou, M., Schoors, S., Lange, C., De Bock, K.,  
858 Dewerchin, M. and Carmeliet, P. (2015) Metabolic control of the cell cycle. *Cell*  
859 *Cycle*, **14**, 3379-3388.



- 860 69. Burgers, P.M.J. and Kunkel, T.A. (2017) Eukaryotic DNA replication fork. *Annu Rev*  
861 *Biochem*, **86**, 417-438.
- 862 70. Hayashi, H. and Akiyoshi, B. (2018) Degradation of cyclin B is critical for nuclear  
863 division in *Trypanosoma brucei*. *Biol Open*, **7**.
- 864 71. Benz, C. and Clayton, C.E. (2007) The F-box protein CFB2 is required for cytokinesis  
865 of bloodstream-form *Trypanosoma brucei*. *Mol Biochem Parasitol*, **156**, 217-224.
- 866 72. Van Hellemond, J.J. and Mottram, J.C. (2000) The CYC3 gene of *Trypanosoma*  
867 *brucei* encodes a cyclin with a short half-life. *Mol Biochem Parasitol*, **111**, 275-282.
- 868 73. Ishii, M. and Akiyoshi, B. (2020) Characterization of unconventional kinetochore  
869 kinases KKT10 and KKT19 in *Trypanosoma brucei*. *J Cell Sci*, **133**.
- 870 74. Saldivia, M., Fang, E., Ma, X., Myburgh, E., Carnielli, J.B.T., Bower-Lepts, C.,  
871 Brown, E., Ritchie, R., Lakshminarayana, S.B., Chen, Y.-L. *et al.* (2020) Targeting  
872 the trypanosome kinetochore with CLK1 protein kinase inhibitors. *Nature*  
873 *Microbiology*.
- 874 75. Hinnebusch, A.G. (2006) eIF3: a versatile scaffold for translation initiation  
875 complexes. *Trends Biochem Sci*, **31**, 553-562.
- 876 76. Mugo, E. and Clayton, C. (2017) Expression of the RNA-binding protein RBP10  
877 promotes the bloodstream-form differentiation state in *Trypanosoma brucei*. *PLoS*  
878 *Pathog*, **13**, e1006560.
- 879 77. Hammarton, T.C., Kramer, S., Tetley, L., Boshart, M. and Mottram, J.C. (2007)  
880 *Trypanosoma brucei* Polo-like kinase is essential for basal body duplication, kDNA  
881 segregation and cytokinesis. *Mol Microbiol*, **65**, 1229-1248.
- 882 78. Kumar, P. and Wang, C.C. (2006) Dissociation of cytokinesis initiation from mitotic  
883 control in a eukaryote. *Eukaryot Cell*, **5**, 92-102.
- 884 79. McAllaster, M.R., Ikeda, K.N., Lozano-Nunez, A., Anrather, D., Unterwurzacher, V.,  
885 Gossenreiter, T., Perry, J.A., Crickley, R., Mercadante, C.J., Vaughan, S. *et al.* (2015)  
886 Proteomic identification of novel cytoskeletal proteins associated with TbPLK, an  
887 essential regulator of cell morphogenesis in *Trypanosoma brucei*. *Mol Biol Cell*, **26**,  
888 3013-3029.
- 889 80. Tu, X. and Wang, C.C. (2004) The involvement of two cdc2-related kinases (CRKs)  
890 in *Trypanosoma brucei* cell cycle regulation and the distinctive stage-specific  
891 phenotypes caused by CRK3 depletion. *J Biol Chem*, **279**, 20519-20528.
- 892 81. Menzies, S.K., Tulloch, L.B., Florence, G.J. and Smith, T.K. (2018) The trypanosome  
893 alternative oxidase: a potential drug target? *Parasitology*, **145**, 175-183.
- 894 82. Li, Z. and Wang, C.C. (2003) A PHO80-like cyclin and a B-type cyclin control the  
895 cell cycle of the procyclic form of *Trypanosoma brucei*. *J Biol Chem*, **278**, 20652-  
896 20658.
- 897 83. Wei, Y., Hu, H., Lun, Z.R. and Li, Z. (2014) Centrin3 in trypanosomes maintains the  
898 stability of a flagellar inner-arm dynein for cell motility. *Nat Commun*, **5**, 4060.
- 899 84. Denninger, V. and Rudenko, G. (2014) FACT plays a major role in histone dynamics  
900 affecting *VSG* expression site control in *Trypanosoma brucei*. *Mol Microbiol*, **94**,  
901 945-962.
- 902 85. Prendergast, L., Muller, S., Liu, Y., Huang, H., Dingli, F., Loew, D., Vassias, I., Patel,  
903 D.J., Sullivan, K.F. and Almouzni, G. (2016) The CENP-T/-W complex is a binding  
904 partner of the histone chaperone FACT. *Genes Dev*, **30**, 1313-1326.
- 905 86. Haanstra, J.R., Gerding, A., Dolga, A.M., Sorgdrager, F.J.H., Buist-Homan, M., du  
906 Toit, F., Faber, K.N., Holzhutter, H.G., Soor, B., Matthews, K.R. *et al.* (2017)  
907 Targeting pathogen metabolism without collateral damage to the host. *Sci Rep*, **7**,  
908 40406.

- 909 87. Khare, S., Nagle, A.S., Biggart, A., Lai, Y.H., Liang, F., Davis, L.C., Barnes, S.W.,  
910 Mathison, C.J., Myburgh, E., Gao, M.Y. *et al.* (2016) Proteasome inhibition for  
911 treatment of leishmaniasis, Chagas disease and sleeping sickness. *Nature*, **537**, 229-  
912 233.
- 913 88. Torrie, L.S., Zuccotto, F., Robinson, D.A., Gray, D.W., Gilbert, I.H. and De Rycker,  
914 M. (2019) Identification of inhibitors of an unconventional *Trypanosoma brucei*  
915 kinetochore kinase. *PLoS One*, **14**, e0217828.
- 916 89. Urbaniak, M.D., Mathieson, T., Bantscheff, M., Eberhard, D., Grimaldi, R., Miranda-  
917 Saavedra, D., Wyatt, P., Ferguson, M.A., Frearson, J. and Drewes, G. (2012)  
918 Chemical proteomic analysis reveals the drugability of the kinome of *Trypanosoma*  
919 *brucei*. *ACS Chem Biol*, **7**, 1858-1865.
- 920 90. Halliday, C., Billington, K., Wang, Z., Madden, R., Dean, S., Sunter, J.D. and  
921 Wheeler, R.J. (2019) Cellular landmarks of *Trypanosoma brucei* and *Leishmania*  
922 *mexicana*. *Mol Biochem Parasitol*, **230**, 24-36.
- 923 91. El-Sayed, N.M., Myler, P.J., Blandin, G., Berriman, M., Crabtree, J., Aggarwal, G.,  
924 Caler, E., Renauld, H., Worthey, E.A., Hertz-Fowler, C. *et al.* (2005) Comparative  
925 genomics of trypanosomatid parasitic protozoa. *Science*, **309**, 404-409.
- 926 92. Langmead, B. and Salzberg, S.L. (2012) Fast gapped-read alignment with Bowtie 2.  
927 *Nat Methods*, **9**, 357-359.
- 928 93. Li, H., Handsaker, B., Wysoker, A., Fennell, T., Ruan, J., Homer, N., Marth, G.,  
929 Abecasis, G., Durbin, R. and Genome Project Data Processing, S. (2009) The  
930 Sequence Alignment/Map format and SAMtools. *Bioinformatics*, **25**, 2078-2079.
- 931 94. Okonechnikov, K., Conesa, A. and Garcia-Alcalde, F. (2016) Qualimap 2: advanced  
932 multi-sample quality control for high-throughput sequencing data. *Bioinformatics*, **32**,  
933 292-294.
- 934 95. Ewels, P., Magnusson, M., Lundin, S. and Kaller, M. (2016) MultiQC: summarize  
935 analysis results for multiple tools and samples in a single report. *Bioinformatics*, **32**,  
936 3047-3048.
- 937 96. Quinlan, A.R. and Hall, I.M. (2010) BEDTools: a flexible suite of utilities for  
938 comparing genomic features. *Bioinformatics*, **26**, 841-842.
- 939 97. Egorov, A.A., Sakharova, E.A., Anisimova, A.S., Dmitriev, S.E., Gladyshev, V.N.  
940 and Kulakovskiy, I.V. (2019) svist4get: a simple visualization tool for genomic tracks  
941 from sequencing experiments. *BMC Bioinformatics*, **20**, 113.
- 942 98. Liao, Y., Smyth, G.K. and Shi, W. (2014) featureCounts: an efficient general purpose  
943 program for assigning sequence reads to genomic features. *Bioinformatics*, **30**, 923-  
944 930.
- 945 99. Virtanen, P., Gommers, R., Oliphant, T.E., Haberland, M., Reddy, T., Cournapeau,  
946 D., Burovski, E., Peterson, P., Weckesser, W., Bright, J. *et al.* (2020) SciPy 1.0:  
947 fundamental algorithms for scientific computing in Python. *Nat Methods*, **17**, 261-  
948 272.
- 949  
950

## 951 **Figure Legends**

952

953 **Figure 1.** A genome-wide conditional knockdown screen for cell cycle progression defects.  
954 **(A)** Schematic representation of the bloodstream form *T. brucei* cell cycle, also showing  
955 aberrant sub-2C and >4C phenotypes. **(B)** The schematic illustrates the RIT-seq screen;  
956 massive parallel induction of RNAi followed by flow cytometry and RIT-seq,  
957 allowing for reconstruction of cell cycle profiles, using mapped reads from each knockdown.  
958 Each read-mapping profile encompasses the gene of interest and associated untranslated  
959 regions present in the cognate mRNA. The library data represents the uninduced and  
960 unsorted population. GeneIDs, Tb927.7.3160 for example, are shown without the common  
961 'Tb927.' component.

962

963 **Figure 2.** Validation and identification of >1000 candidates linked to cell cycle defects. **(A)**  
964 The plot on the left shows knockdowns overrepresented in the >4C experiment in red; those  
965 with >1.5-fold the sum of reads in the G<sub>1</sub>, S phase and G<sub>2</sub>M samples combined. The read-  
966 mapping profile and read-counts for  $\alpha/\beta$ -tubulin are shown to the right. **(B)** The plot on the  
967 left shows knockdowns overrepresented in the sub-2C experiment in orange; those with  
968 >1.5-fold the sum of reads in the G<sub>1</sub>, S phase and G<sub>2</sub>M samples combined. The read-  
969 mapping profile and read-counts for DOT1A are shown to the right. **(C)** The plots on the left  
970 shows knockdowns overrepresented in the G<sub>1</sub>, S phase and G<sub>2</sub>M experiments in purple,  
971 green and blue, respectively; those that were >25% overrepresented in each category.  
972 Read-mapping profiles and relative read-counts for example hits are shown to the right.  
973 PCNA, proliferating cell nuclear antigen; PPL2, PrimPol-like 2. **(D)** The Venn diagram shows  
974 the distribution of knockdowns overrepresented in each arm of the screen.

975

976 **Figure 3.** Cytokinesis defects associated with endoreduplication. **(A)** The bar-graph shows  
977 enriched Gene Ontology terms in the >4C overrepresented dataset. **(B)** The violin plot  
978 shows relative >4C read-counts for cohorts of genes and reflects data distribution. Open  
979 circles indicate median values and the vertical bars indicate 95% confidence intervals.  
980 Significantly overrepresented cohorts are indicated in red. **(C)** The plots show  
981 overrepresentation of T-complex, dynein and intraflagellar transport (IFT) factors in red in the  
982 >4C experiment. **(D)** The heatmaps show relative representation in all five sorted pools for  
983 the above and additional cohorts of knockdowns; blue, most overrepresented. **(E)** Example  
984 read-mapping profiles for hits overrepresented in the >4C pool. **(F)** Example read-mapping  
985 profiles for ciliopathy-associated hits overrepresented in the >4C pool. CMF, Component of  
986 Motile Flagella; CFAP, Cilia and Flagella Associated Protein.

987

988 **Figure 4.** Defects producing sub-diploid cells. Read-mapping profiles and read-counts for  
989 example hits overrepresented in the <2C experiment. HPC, Hypothetical Protein,  
990 Conserved.

991

992 **Figure 5.** A profile of G<sub>1</sub>, S phase and G<sub>2</sub>/mitosis defects. **(A)** The RadViz plot shows  
993 knockdowns that registered >25% overrepresented read-counts in the G<sub>1</sub>, S phase or G<sub>2</sub>M  
994 categories. **(B)** The bar-graphs shows enriched Gene Ontology terms in the G<sub>1</sub>, S phase or  
995 G<sub>2</sub>M overrepresented datasets. **(C)** The violin plots show relative G<sub>1</sub>, S phase or G<sub>2</sub>M read-  
996 counts for cohorts of genes and reflects data distribution. Open circles indicate median  
997 values and the vertical bars indicate 95% confidence intervals. Overrepresented cohorts are  
998 indicated in purple, green and blue, respectively. **(D)** The heatmaps show relative  
999 representation in all five sorted pools for the above and additional cohorts of knockdowns;  
1000 blue, most overrepresented.

1001

1002 **Figure 6.** Protein complexes and pathways associated with G<sub>1</sub>, S phase and G<sub>2</sub>/mitosis  
1003 defects. **(A)** The RadViz plot shows glycolytic enzyme knockdowns. Those that registered  
1004 >25% overrepresented read-counts in the G<sub>1</sub> category are indicated, purple. Black data-  
1005 points indicate other genes from each cohort. Grey data-points indicate all other genes. The  
1006 read-mapping profiles and relative read-counts in the lower panel show example hits. **(B)** As  
1007 in a but for DNA replication initiation factor knockdowns that registered >25%  
1008 overrepresented read-counts in the S phase category, indicated in green. **(C)** As in a but for  
1009 proteasome component knockdowns that registered >25% overrepresented read-counts in  
1010 the G<sub>2</sub>M category, indicated in blue. **(D)** As in a but for kinetochore component knockdowns  
1011 that registered >25% overrepresented read-counts in the S phase or G<sub>2</sub>M categories,  
1012 indicated in green or blue, respectively.

1013

1014 **Figure 7.** RBPs kinases and hypothetical proteins associated with gap and S phase defects.  
1015 **(A)** The RadViz plot shows mRNA binding protein knockdowns (RBPs). Those that  
1016 registered >25% overrepresented read-counts in the G<sub>1</sub>, S phase or G<sub>2</sub>M categories are  
1017 indicated, in purple, green and blue, respectively. The read-mapping profiles and relative  
1018 read-counts in the lower panels show example hits. **(B)** As in a but for protein kinase  
1019 knockdowns. **(C)** As in a but for hypothetical (conserved) protein knockdowns.

## 1020 **Supplementary Figure Legends**

1021

1022 **Figure 1—figure supplement 1.** Induced library sorting and RNAi target amplification. **(A)**  
1023 BD Influx™ cell sorter BD FACSort™ software workspace data for the sorting session  
1024 showing the gates and population frequencies. **(B)** Flow cytometry quality control data for  
1025 the sorted samples. Three types of graphs are shown: SSC-Area x FSC-Area (cell  
1026 morphology); PI-Area x PI-Width (cells stained with PI; the gate excludes cell aggregates);  
1027 Modal x PI-Area (cells within the gate set in the PI-Area x PI-Width plot). Top row –  
1028 unsorted; second row – G<sub>1</sub>; third row – S; fourth row – G<sub>2</sub>M; bottom row – overlay of the  
1029 sorted and unsorted samples. 2C and 4C refer to unduplicated (diploid genome) and  
1030 duplicated DNA content, respectively. **(C)** PCR amplification of each sorted sample with Lib3  
1031 primers, prior to sequencing.

1032

1033 **Figure 1—figure supplement 2.** RIT-seq data comparing unsorted libraries. **(A)** The plot  
1034 shows read-counts for 7,204 genes and for uninduced and 24 h induced samples. Reads for  
1035 only 0.6% of genes dropped by >3-fold following 24 h of knockdown. **(B)** The violin plots  
1036 show relative read-counts for cohorts of genes and reflect data distribution. Open circles  
1037 indicate median values and the vertical bars indicate 95% confidence intervals. Read-counts  
1038 remain relatively high after 24 h knockdown in the current study, when compared to read-  
1039 counts after 72 h knockdown in a prior RIT-seq study.

1040

1041 **Figure 2—figure supplement 1.** RIT-seq data mapped to *T. brucei* chromosomes; for 7,204  
1042 genes and five experiments = 36,020 data-points. Light and dark green indicate polycistronic  
1043 transcription in the forward and reverse directions, respectively, on each chromosome. The  
1044 heat maps (dark-blue to yellow) indicate rank enrichment for knockdowns in each cell cycle  
1045 phase; most enriched are dark-blue. The coloured data-points below indicate those ‘hits’  
1046 enriched in each cell cycle phase and used for much of the analysis reported here; 1,158 or  
1047 16.1% of genes. See the text for more details.

1048

1049 **Figure 2—figure supplement 2.** Online RIT-seq data visualization ([https://tryp-](https://tryp-cycle.onrender.com)  
1050 [cycle.onrender.com](https://tryp-cycle.onrender.com)). In the radial visualization, experimental-points are hours on the clock-  
1051 face (i.e. related to the angle of the polar coordinate system). The orthogonal axis (i.e. the  
1052 distance) relates to the relative read-counts across the five experiments. The table on the  
1053 right shows: Geneid, gene identification number; relative abundance of reads in each sorted  
1054 sample; desc, gene description; class, the experiment where the gene shows maximum  
1055 abundance; selected, a binary tag where ‘1’ indicates genes in the radial visualization. Gene

1056 coverage images are displayed when hovering over dots on the radial visualization or over  
1057 table rows.

1058 Data transformation to aid visualization: Normalised TPM values from  
1059 **Supplementary file 1** were used, except the <2C and >4C values were divided by the sum  
1060 of TPM values from all five sorted samples. we elevated the values to the power of 2.1 to  
1061 maximize differences. We then normalized the values row wise for each gene, by dividing  
1062 values by the maximum. The transformed data was then fed to the radial visualization  
1063 algorithm implemented in D3.js (<https://github.com/d3/d3>); code and web page were adapted  
1064 from the repository at <https://github.com/WYanChao/RadViz>.

1065  
1066 **Figure 3—figure supplement 1.** Cytokinesis defects associated with endoreduplication.  
1067 One hundred example RIT-seq cell cycle profiles are shown for hits overrepresented in the  
1068 >4C pool. Page 1 shows the heatmaps indicating relative representation in all five sorted  
1069 pools; blue, most overrepresented. Subsequent pages show read-mapping profiles for each  
1070 gene; see Figure 1B for further details.

1071  
1072 **Figure 7—figure supplement 1.** Knockdowns associated with gap and S phase defects.  
1073 Seventy-eight example RIT-seq cell cycle profiles are shown for hits overrepresented in the  
1074 G<sub>1</sub>, S phase and G<sub>2</sub>M experiments. Page 1 shows the heatmaps indicating relative  
1075 representation in all five sorted pools; blue, most overrepresented. Subsequent pages show  
1076 read-mapping profiles for each gene; see Figure 1B for further details.

1077  
1078 **Supplementary file 1.** RIT-seq digital data. The Excel file reports the total fragment counts  
1079 for the uninduced (column C) and induced (column D) RNAi libraries, for the five sorted  
1080 samples (columns E-I), normalised read-counts for the sorted samples (columns J-N) and  
1081 normalised barcoded read-counts for the G<sub>1</sub> (column O), S (column P) and G<sub>2</sub>M (column Q)  
1082 samples. The final column (R) indicates Figure numbers for genes shown in the manuscript.  
1083 TPM, Transcripts Per kilobase Million. Coloured values in column J-Q indicates enrichment  
1084 in those samples; >1.5-fold the sum of normalised TPM in the G<sub>1</sub>+S+G<sub>2</sub>M samples in  
1085 columns J and N, >41.66% (>25% above the mean) in columns K-M and also >40% (>20%  
1086 above the mean) in columns O-Q. Genes considered in Figure 2 and used to generate Gene  
1087 Ontology profiles surpass both the 25% total reads and 20% barcoded reads thresholds i.e.  
1088 coloured in columns O-Q. Data are presented for 7,204 genes, which is 98% of the non-  
1089 redundant gene set; all genes register >99 total reads across the five sorted samples.

1090

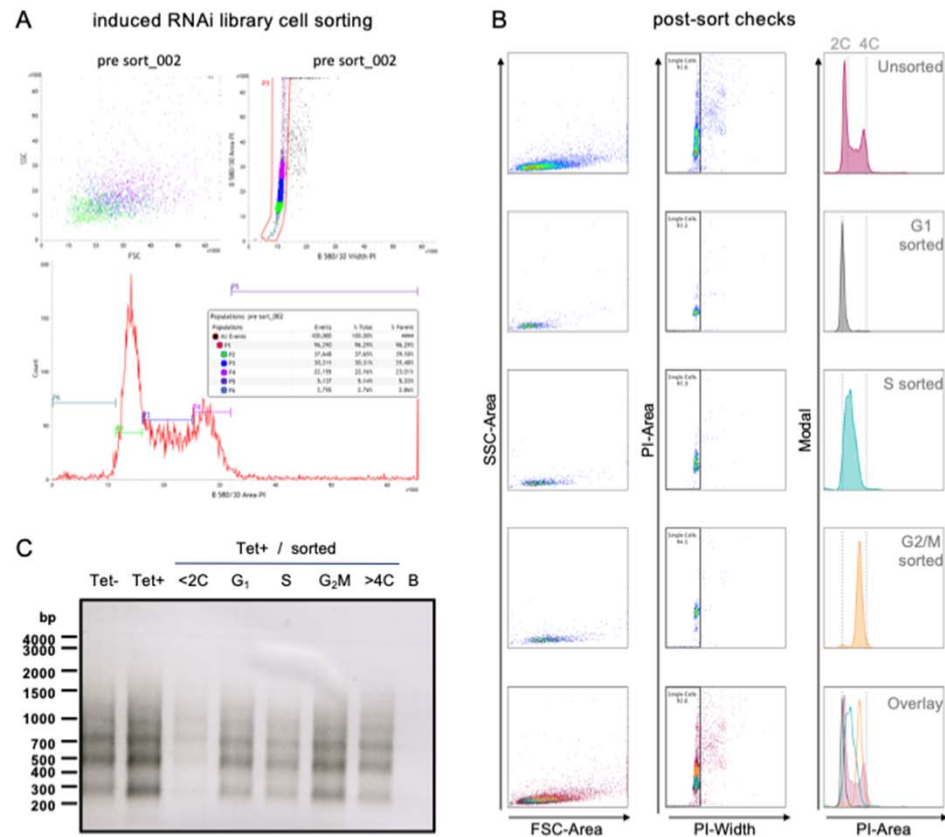

**Figure 1—figure supplement 1.** Induced library sorting and RNAi target amplification. **(A)** BD Influx™ cell sorter BD FACSort™ software workspace data for the sorting session showing the gates and population frequencies. **(B)** Flow cytometry quality control data for the sorted samples. Three types of graphs are shown: SSC-Area x FSC-Area (cell morphology); PI-Area x PI-Width (cells stained with PI; the gate excludes cell aggregates); Modal x PI-Area (cells within the gate set in the PI-Area x PI-Width plot). Top row – unsorted; second row – G<sub>1</sub>; third row – S; fourth row – G<sub>2</sub>M; bottom row – overlay of the sorted and unsorted samples. 2C and 4C refer to unduplicated (diploid genome) and duplicated DNA content, respectively. **(C)** PCR amplification of each sorted sample with Lib3 primers, prior to sequencing; B, blank.

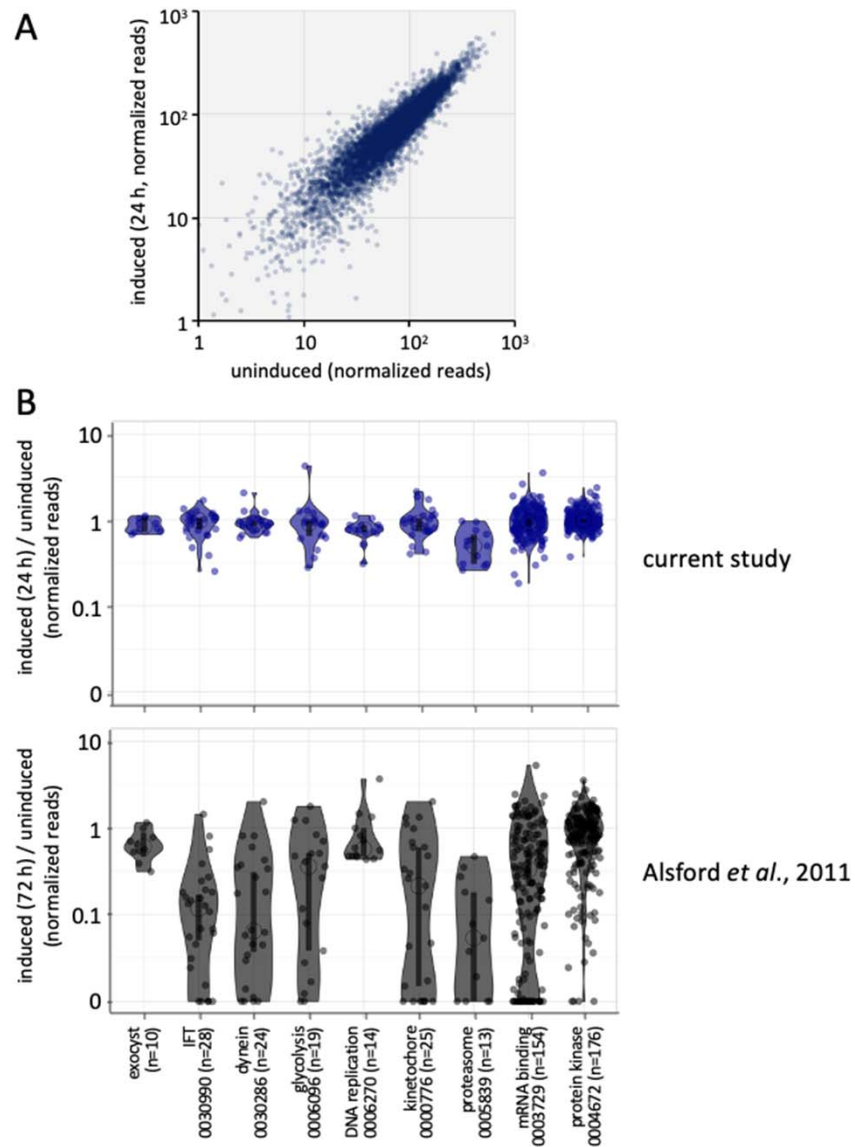

**Figure 1—figure supplement 2.** RIT-seq data comparing unsorted libraries. **(A)** The plot shows read-counts for 7,204 genes and for uninduced and 24 h induced samples. Reads for only 0.6% of genes dropped by >3-fold following 24 h of knockdown. **(B)** The violin plots show relative read-counts for cohorts of genes and reflect data distribution. Open circles indicate median values and the vertical bars indicate 95% confidence intervals. Read-counts remain relatively high after 24 h knockdown in the current study, when compared to read-counts after 72 h knockdown in a prior RIT-seq study.



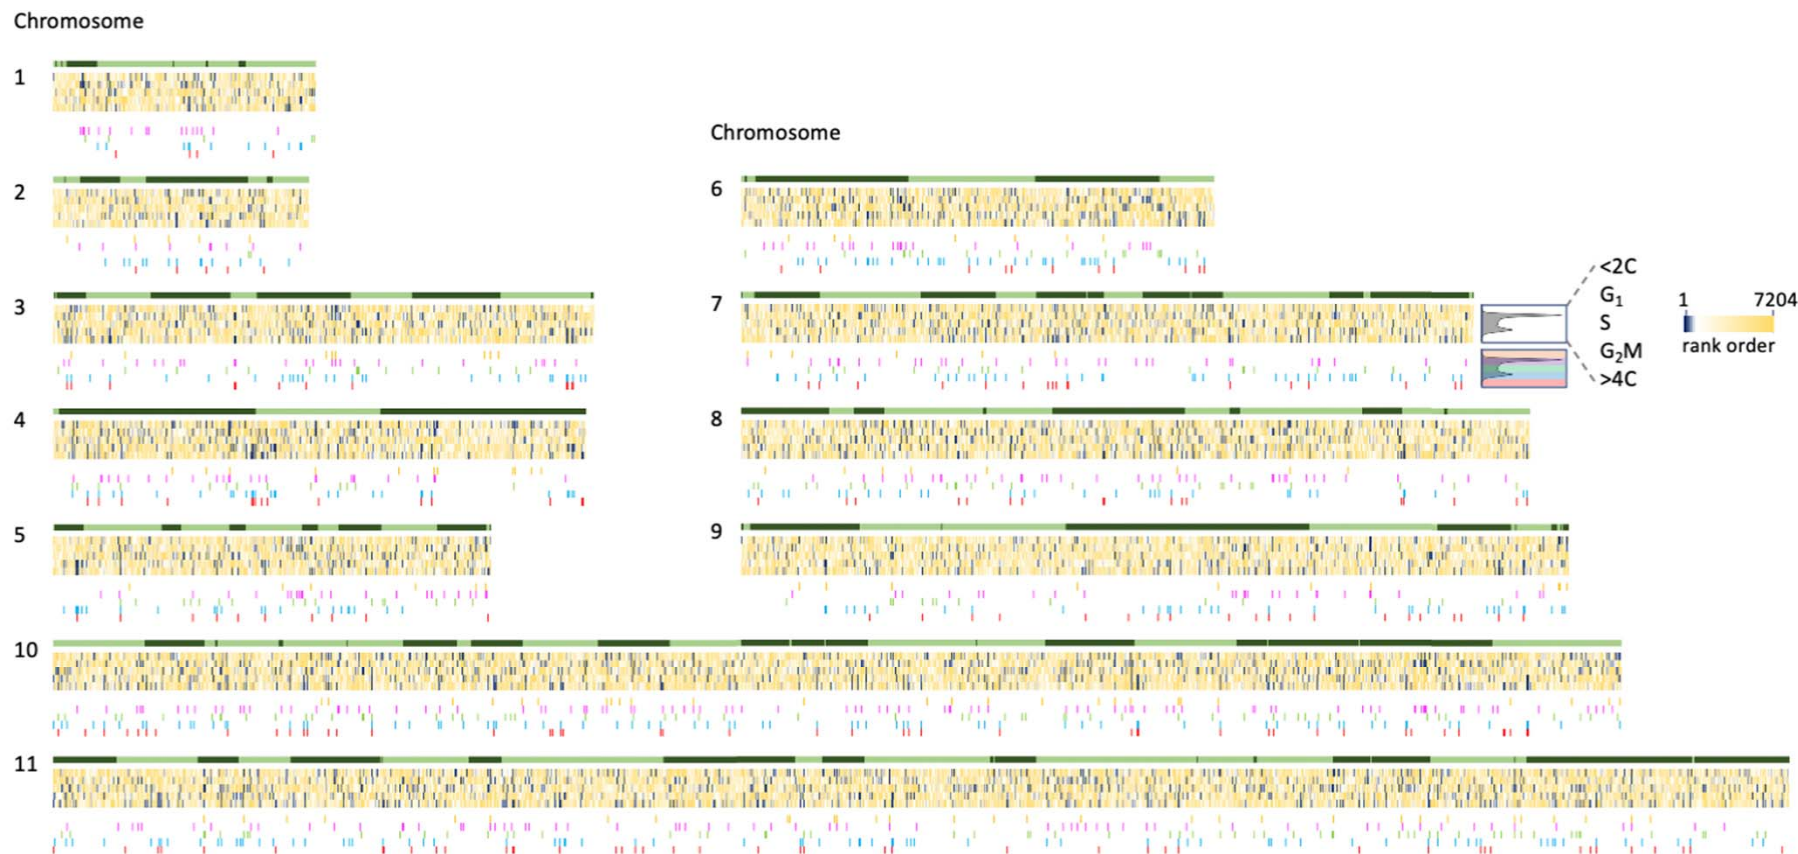

**Figure 2—figure supplement 1.** RIT-seq data mapped to *T. brucei* chromosomes; for 7,204 genes and five experiments = 36,020 data-points. Light and dark green indicate polycistronic transcription in the forward and reverse directions, respectively, on each chromosome. The heat maps (dark-blue to yellow) indicate rank enrichment for knockdowns in each cell cycle phase; most enriched are dark-blue. The coloured data-points below indicate those ‘hits’ enriched in each cell cycle phase and used for much of the analysis reported here; 1,158 or 16.1% of genes. See the text for more details.

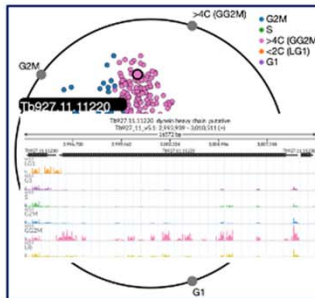

Mouse-over reveals sequence tracks for each gene

The RadViz plot shows 270 'hits' featured in the manuscript

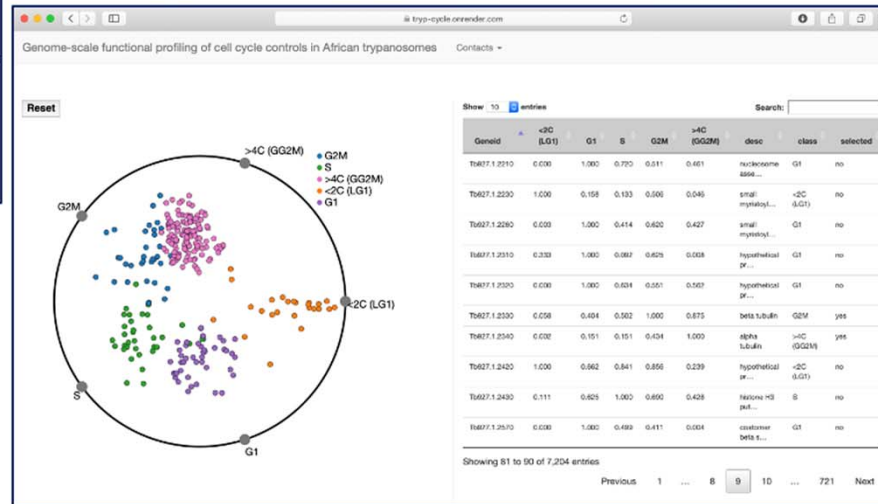

The table lists all 7,204 genes

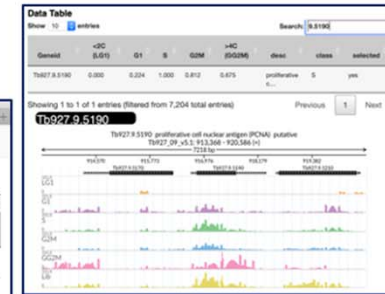

The data can be searched by GeneID or description. Mouse-over also reveals sequence tracks

**Figure 2—figure supplement 2.** Online RIT-seq data visualization (<https://tryp-cycle.onrender.com>). In the radial visualization, experimental-points are hours on the clock-face (i.e. related to the angle of the polar coordinate system). The orthogonal axis (i.e. the distance) relates to the relative read-counts across the five experiments. The table on the right shows: Geneid, gene identification number; relative abundance of reads in each sorted sample; desc, gene description; class, the experiment where the gene shows maximum abundance; selected, a binary tag where 'yes' indicates genes in the radial visualization. Gene coverage images are displayed when hovering over dots on the radial visualization or over table rows.

Data transformation to aid visualization: Normalised TPM values from [Supplementary file 1](#) were used, except the <2C and >4C values were divided by the sum of TPM values from all five sorted samples. we elevated the values to the power of 2.1 to maximize differences. We then normalized the values row wise for each gene, by dividing values by the maximum. The transformed data was then fed to the radial visualization algorithm implemented in D3.js (<https://github.com/d3/d3>); code and web page were adapted from the repository at <https://github.com/WYanChao/RadViz>.

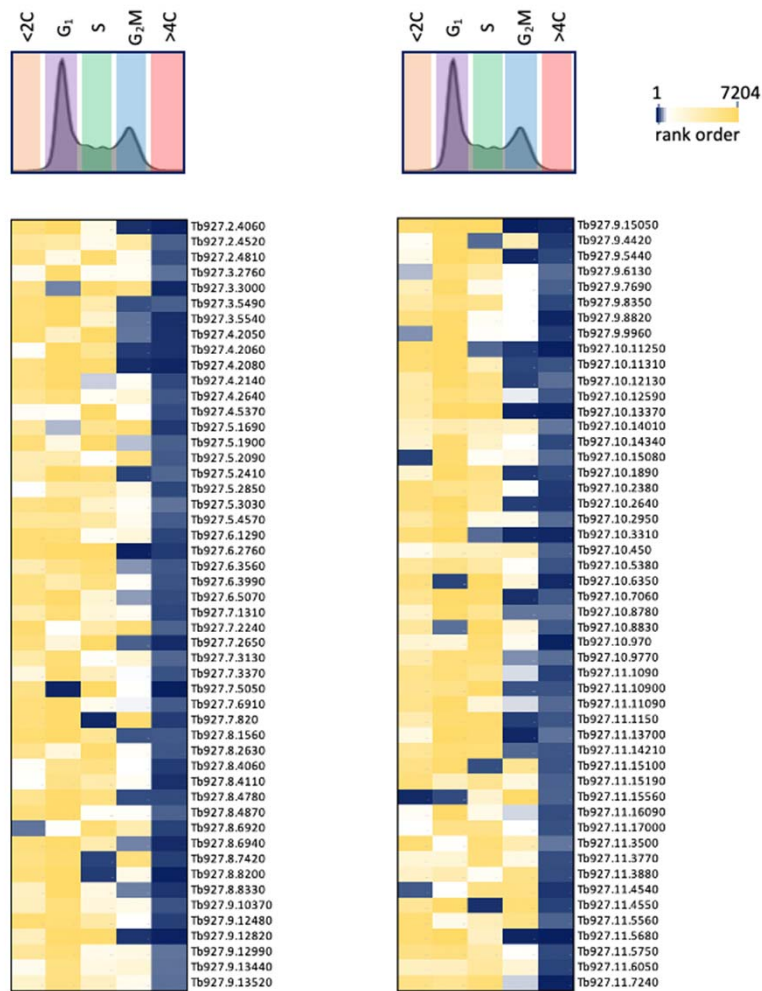

**Figure 3—figure supplement 1.** Cytokinesis defects associated with endoreduplication. One hundred example RIT-seq cell cycle profiles are shown for hits overrepresented in the >4C pool. Page 1 shows the heatmaps, indicating relative representation in all five sorted pools; blue, most overrepresented. Subsequent pages show read-mapping profiles for each gene; see Figure 1B for further details.

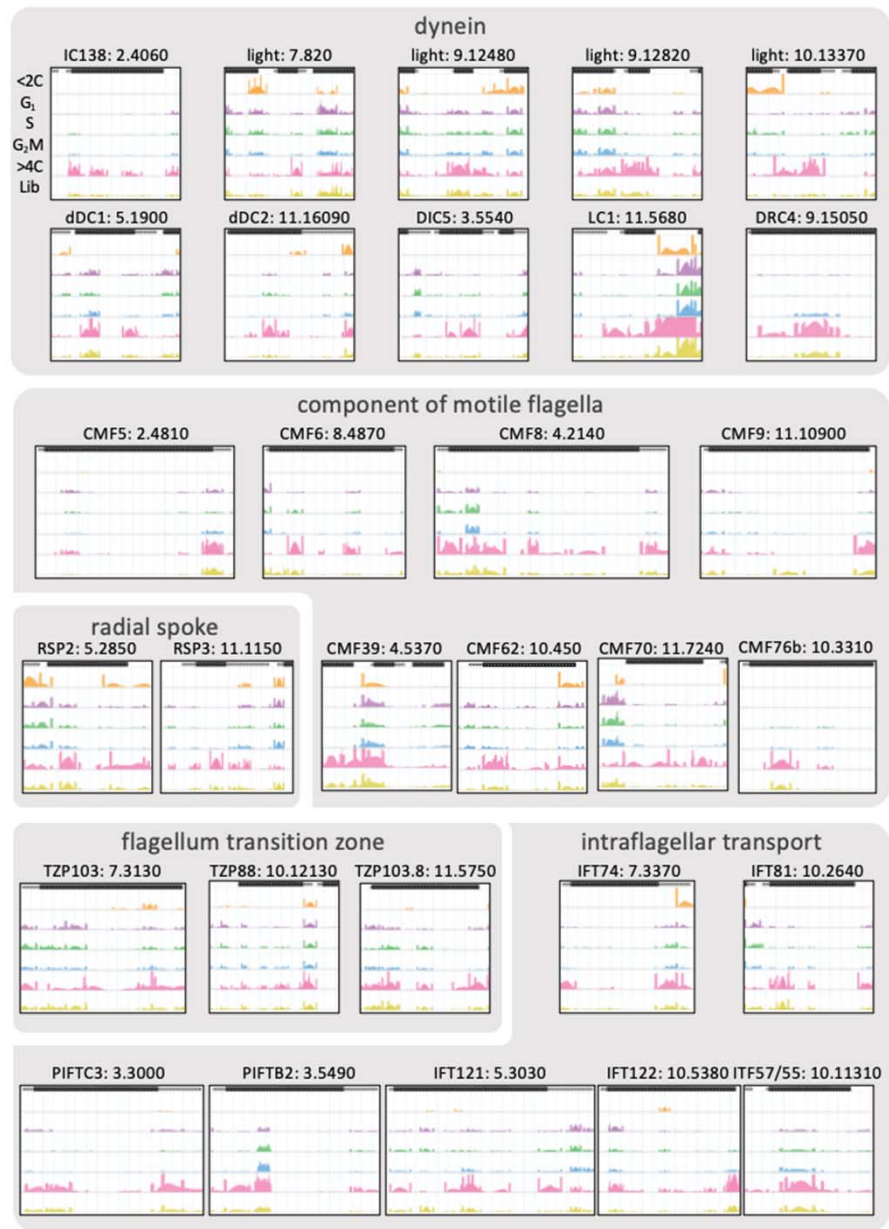

Figure 3 – figure supplement 1 – p2 of 5

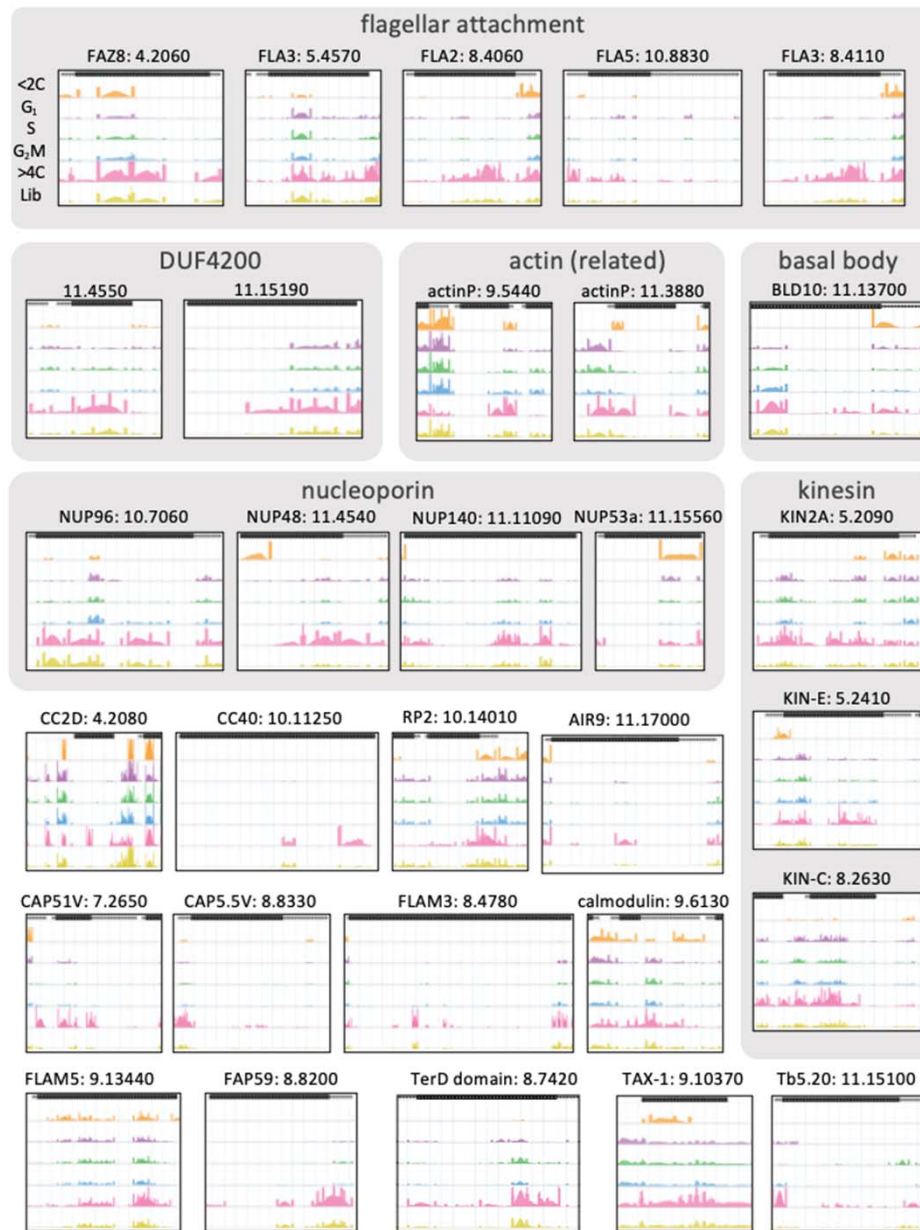

Figure 3 – figure supplement 1 – p3 of 5

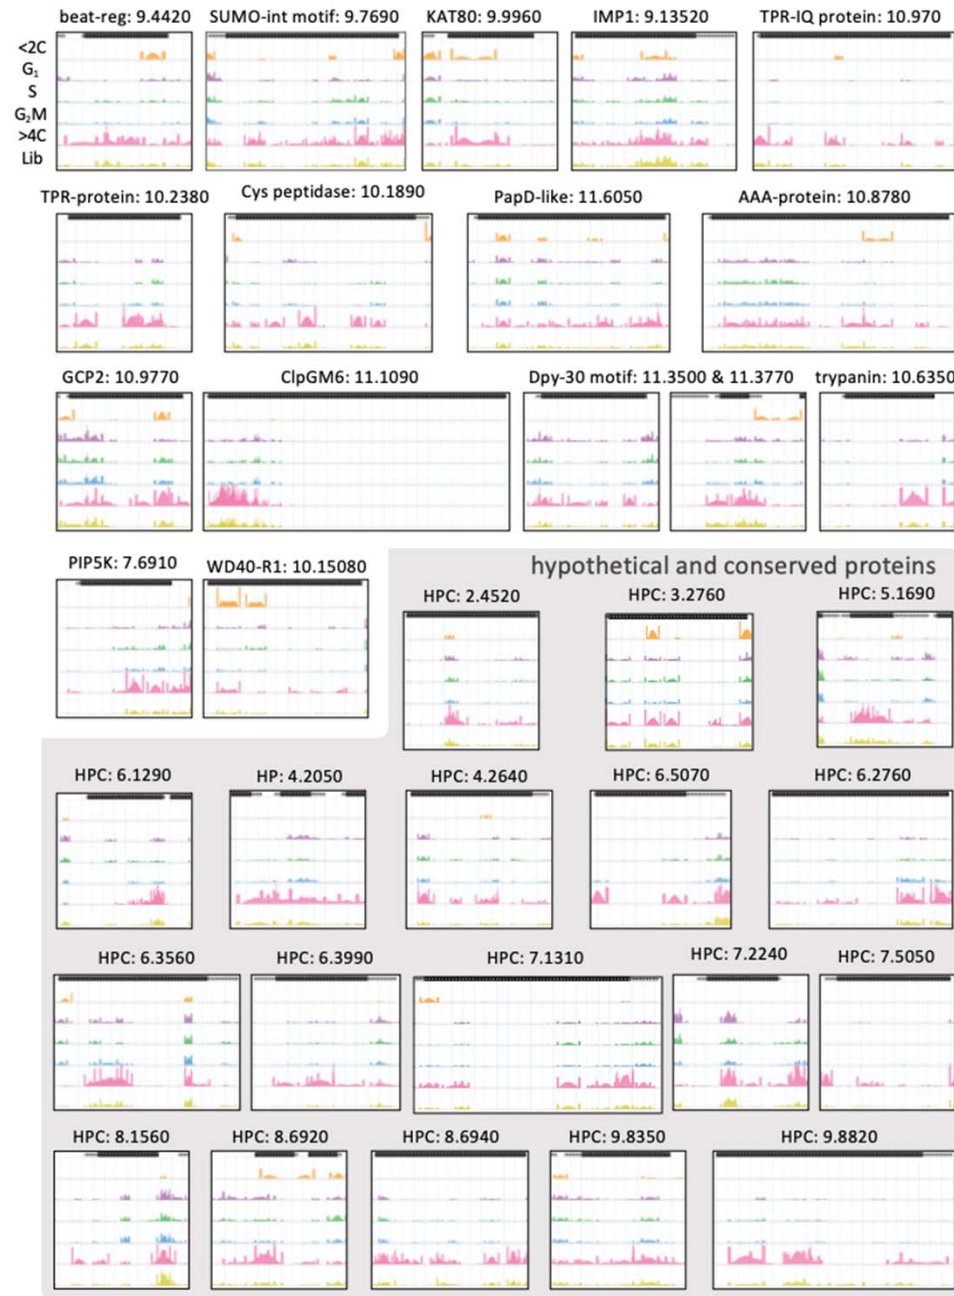

Figure 3 – figure supplement 1 – p4 of 5

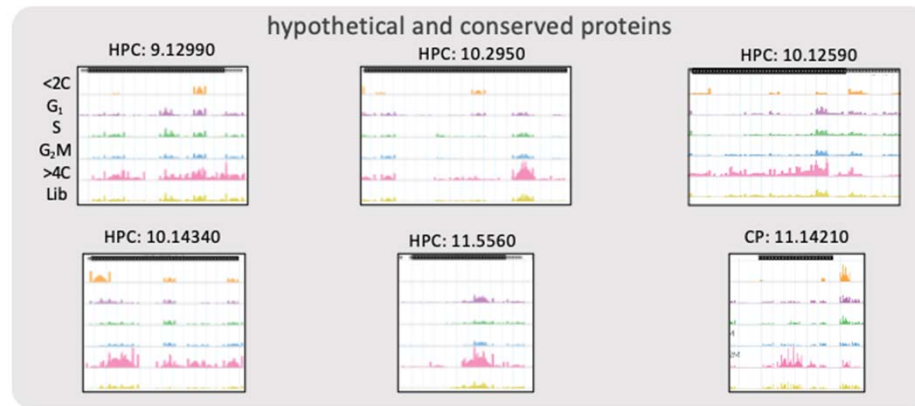

Figure 3 – figure supplement 1 – p5 of 5

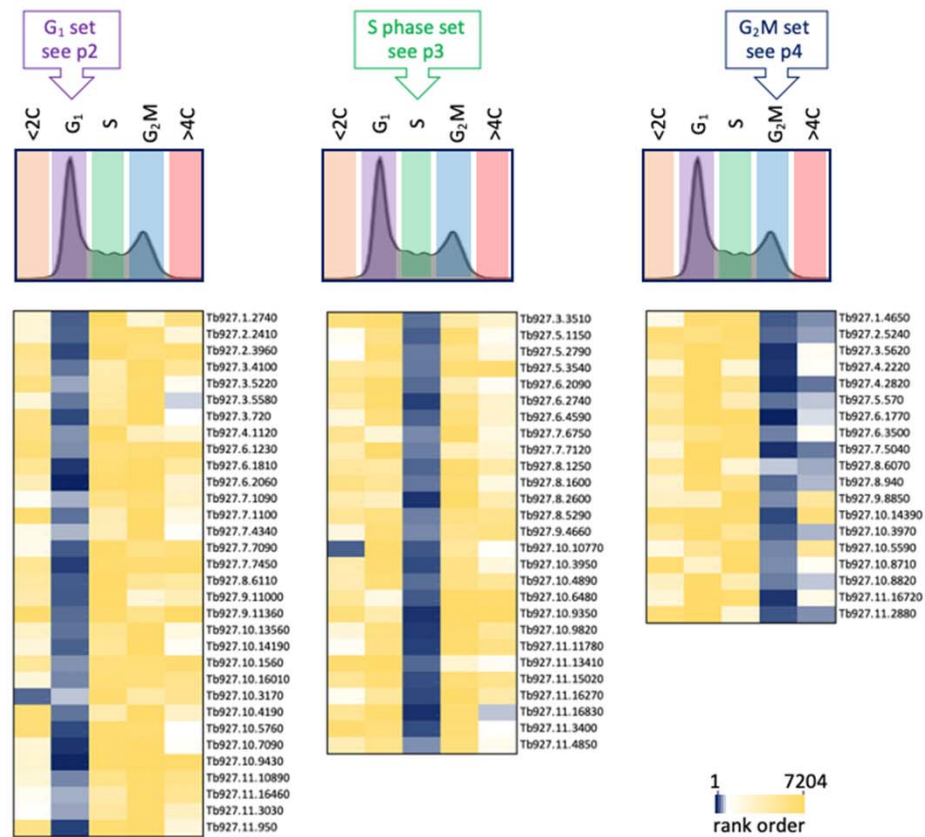

**Figure 7—figure supplement 1.** Knockdowns associated with gap and S phase defects. Seventy-eight example RIT-seq cell cycle profiles are shown for hits overrepresented in the G<sub>1</sub>, S phase and G<sub>2</sub>M experiments. Page 1 shows the heatmaps indicating relative representation in all five sorted pools; blue, most overrepresented. Subsequent pages show read-mapping profiles for each gene; see Figure 1B for further details.



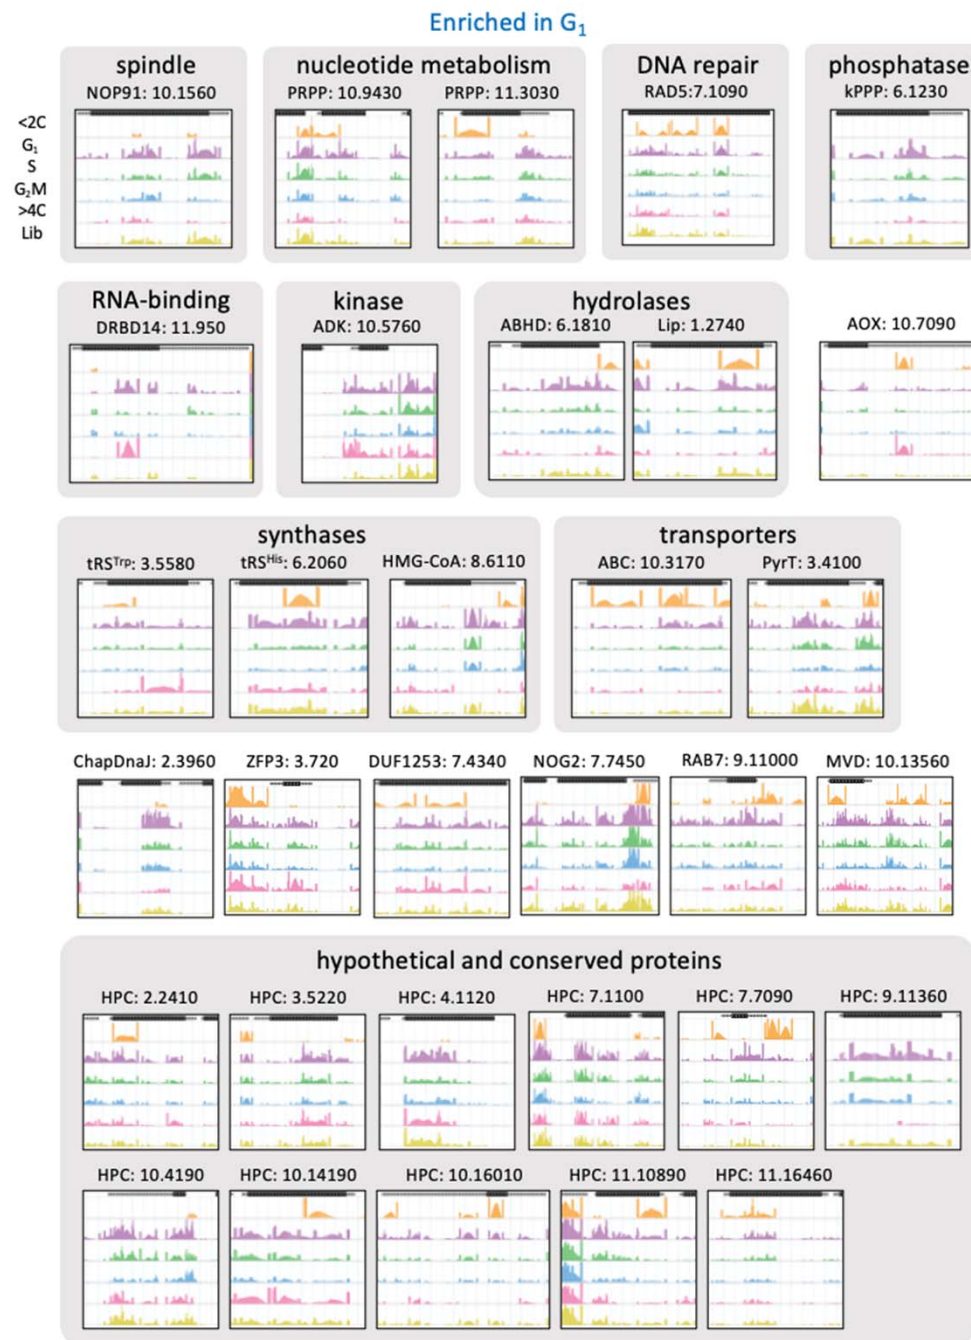

Figure 7 – figure supplement 1 – p2 of 4

Enriched in S phase

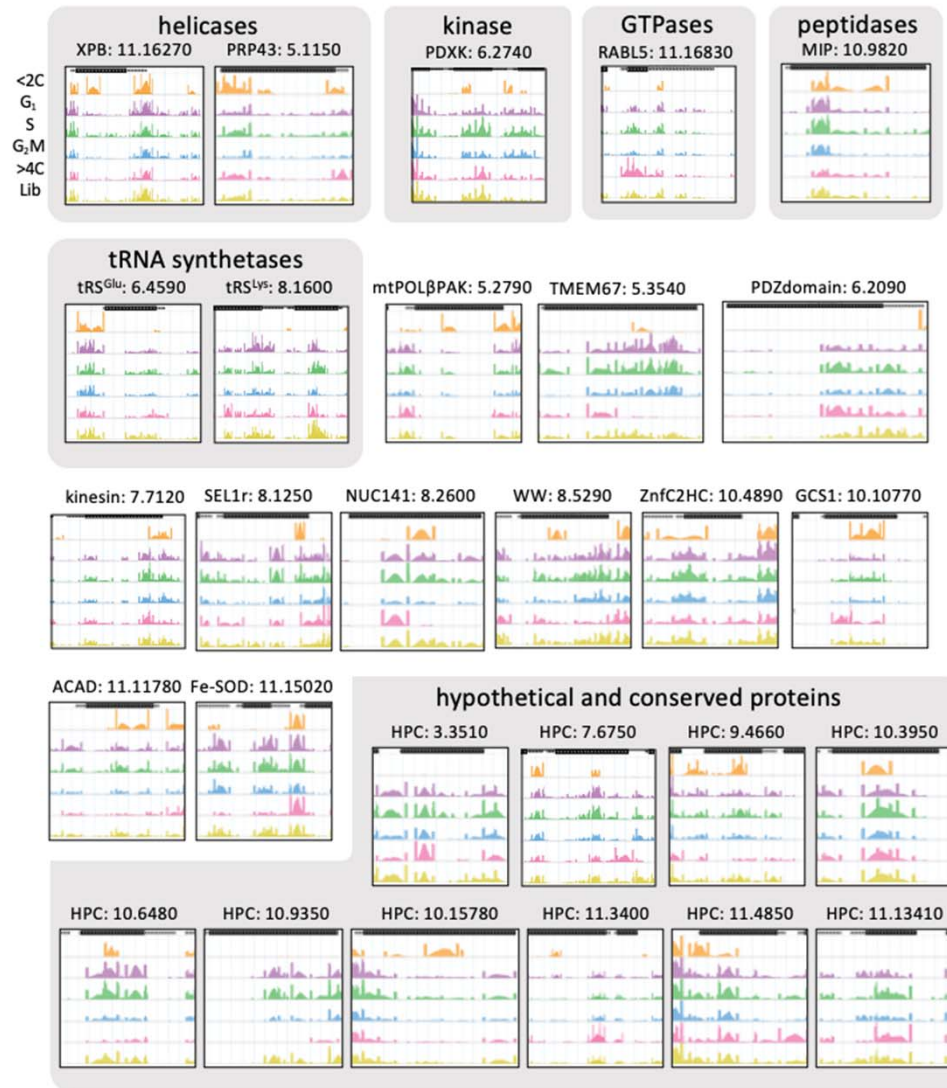

Figure 7 – figure supplement 1 – p3 of 4

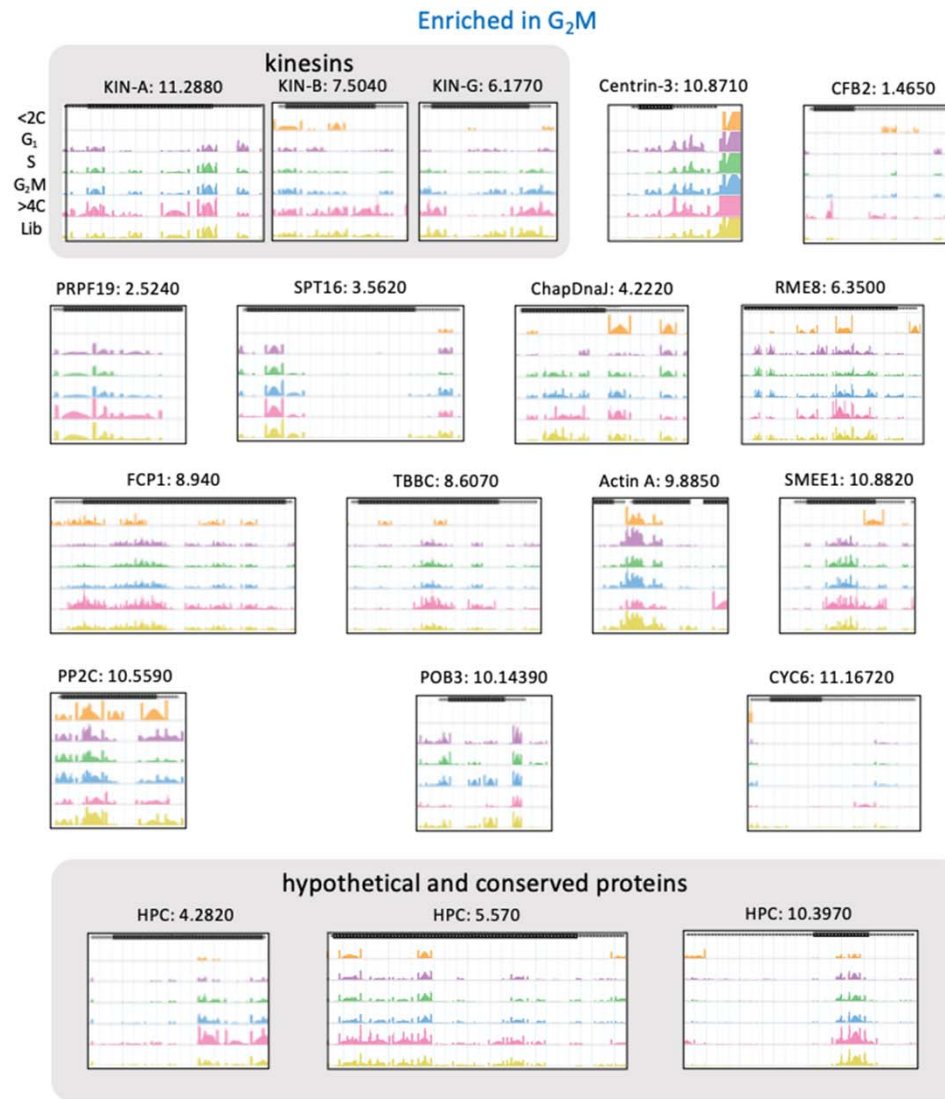

Figure 7 – figure supplement 1 – p4 of 4
